1 **Auxin-Induced Actin Cytoskeleton Rearrangements Require AUX1**

2

3 Ruthie S. Arieti<sup>a,b</sup> and Christopher J. Staiger<sup>a,c,1</sup>

4

5 <sup>a</sup>Department of Biological Sciences, Purdue University, West Lafayette, IN 47907-2064

6 <sup>b</sup>Purdue University Interdisciplinary Life Sciences Graduate Program (PULSe)

7 <sup>c</sup>Department of Botany and Plant Pathology, Purdue University, West Lafayette, IN

8 47907

9

10 <sup>1</sup>Author for contact: Christopher J. Staiger; [staiger@purdue.edu](mailto:staiger@purdue.edu)

11

12 ORCID IDS: 0000-0001-8706-635X (R.S.A.); 0000-0003-2321-1671 (C.J.S.)

13

14

15

16

17

18

19

20

21

22

23

24

25

26 One sentence summary: The Arabidopsis AUX1 auxin transport protein is necessary for  
27 actin cytoskeleton reorganization in response to phytohormone treatment.

28

29

30 Short title: Auxin stimulates actin through AUX1

31

## 32 **ABSTRACT**

33 The actin cytoskeleton is required for cell expansion and is implicated in cellular  
34 responses to the plant growth hormone auxin. However, the molecular and cellular  
35 mechanisms that coordinate auxin signaling, cytoskeletal remodeling, and cell  
36 expansion are poorly understood. Previous studies have examined actin cytoskeleton  
37 responses to long-term auxin treatment, but plants respond to auxin over short  
38 timeframes, and growth changes within minutes of exposure to the hormone. To  
39 correlate actin arrays with degree of cell expansion, we used quantitative imaging tools  
40 to establish a baseline of actin organization, as well as of individual filament behaviors  
41 in root epidermal cells under control conditions and after treatment with a known  
42 inhibitor of root growth, the auxin indole-3-acetic acid (IAA). We found that cell length  
43 was highly predictive of actin array in control roots, and that short-term IAA treatment  
44 stimulated denser, more longitudinal, and more parallel arrays by inducing filament  
45 unbundling within minutes. By demonstrating that actin filaments were more “organized”  
46 after a treatment that stopped elongation, we show there is no direct relationship  
47 between actin organization and cell expansion and refute the hypothesis that “more  
48 organized” actin universally correlates with more rapidly growing root cells. The plasma  
49 membrane-bound auxin transporter AUXIN RESISTANT 1 (AUX1) has previously been  
50 shown necessary for archetypal short-term root growth inhibition in the presence of IAA.  
51 Although AUX1 was not previously suspected of being upstream of cytoskeletal  
52 responses to IAA, we used *aux1* mutants to demonstrate that AUX1 is necessary for the  
53 full complement of actin rearrangements in response to auxin, and that cytoplasmic  
54 auxin in the form of NAA is sufficient to stimulate a partial actin response. Together,  
55 these results are the first to quantitate actin cytoskeleton response to short-term auxin  
56 treatments and demonstrate that AUX1 is necessary for short-term actin remodeling.

57

## 58 INTRODUCTION

59 Despite human dependence on plants for food, fiber, and fuel, we do not fully  
60 understand the molecular mechanisms controlling plant growth. Many types of plant  
61 cells begin life as roughly isotropic but, during development, the cell establishes polar  
62 growth where deposition of cell wall materials is restricted to specific axes of the cell, or  
63 expansion is anisotropic, allowing the production of mature cells with a myriad of final  
64 shapes and sizes. Turgor pressure drives expansion within the confines of cell wall  
65 flexibility: certain areas of the plant cell wall are more flexible than others, and are  
66 therefore more susceptible to turgor pressure exerted by the vacuole (Szymanski and  
67 Cosgrove, 2009; Guerriero et al., 2014). Vesicles are incorporated into certain areas of  
68 the plasma membrane and deposit new cell wall material, increasing the cell's surface  
69 area and conducting the cell to grow into specific shapes. Vesicle delivery and  
70 exocytosis of vesicle contents of wall materials depend on the actin cytoskeleton  
71 (Ketelaar et al., 2003; Hussey et al., 2006; Leucci et al., 2007; Zhang et al., 2019).  
72 When actin is disrupted with pharmacological treatments, cells elongate more slowly  
73 (Baluška et al., 2001), implicating actin as a crucial player in cell expansion. Although  
74 the actin cytoskeleton is required for plant cell expansion (Baluška et al., 2001; Gilliland  
75 et al., 2003; Mathur, 2004; Hussey, 2006; Rahman et al., 2007; Kandasamy et al., 2009;  
76 Yang et al., 2011; Guerriero et al., 2014), actin's function in this process is not well  
77 understood. Actin is accepted to provide tracks for vesicle delivery (Mathur, 2004;  
78 Hussey et al., 2006), but connections have also been made between certain actin  
79 arrays and plant growth (ex., Nick et al., 2009; Higaki et al., 2010a; Smertenko et al.,  
80 2010; Dyachok et al., 2011; Yang et al., 2011, Yanagisawa et al., 2015), resulting in

81 various hypotheses about actin's role and/or the significance of specific actin arrays,  
82 each with a degree of supporting evidence, much of it circumstantial (Li et al., 2015a;  
83 Szymanski and Staiger, 2017).

84 Actin arrays form an apparently "organized" orientation, with actin bundles  
85 roughly parallel to the longitudinal axis of the cell in rapidly growing root epidermal cells  
86 in the light (Dyachok et al., 2011). In the dark, where cell expansion is substantially  
87 slower, actin exhibits what appears to be a state of "disorganization": filaments are  
88 substantially less aligned relative to the longitudinal axis of root cells (Dyachok et al.,  
89 2011). However, data substantiating cause-and-effect are missing from the literature.  
90 Whether a longitudinal array is necessary for, coincides with, promotes, or (conversely)  
91 is the product of, cell expansion—or whether the "disorganized" array inhibits or  
92 coincides with a cessation of expansion—is not understood and is largely unexamined.

93 In addition to longitudinal actin orientation, various actin arrays have been  
94 correlated with cell length or cell expansion. However, there does not seem to be  
95 consensus on whether more longitudinal bundles inhibit (Gilliland et al., 2003; Holweg et  
96 al., 2004; Rahman et al., 2007) or stimulate (Kandasamy et al., 2009; Yang et al., 2011;  
97 Li et al., 2014a) axial cell expansion and tissue growth. Many previous studies linking  
98 specific actin organizations with growth or growth inhibition are based on actin or  
99 actin-binding protein mutant phenotypes (Gilliland et al., 2003, Kandasamy et al., 2009,  
100 Yang et al., 2011; Li et al., 2014a). Others are based on actin responses to drug or  
101 hormone treatments (Holweg et al., 2004; Rahman et al., 2007). Therefore, some of the  
102 reported actin–cell growth models may be generalized from what might in fact be more  
103 discrete responses: cytoskeletal response to a specific external stimulus (drug or

104 hormone) that affects growth via downstream mechanisms; or filament array changes  
105 due to an actin-binding protein whose role could be in only one of many aspects of  
106 growth.

107 In fact, what tasks, exactly, actin undertakes during cell expansion and how  
108 these tasks drive or participate in expansion are unclear. Bundles potentially inhibit  
109 growth by inhibiting transport of growth hormone-related proteins (Nick, 2010). On the  
110 other hand, long actin bundles presumably stimulate growth because they provide  
111 tracks for vesicle delivery (Szymanski and Cosgrove, 2009; Thomas, 2012). Actin  
112 bundles could play a role in regulating osmotic pressure in the vacuole by altering turgor  
113 pressure (Higaki et al., 2010a,b; 2011), the main driver of plant cell expansion  
114 (Szymanski and Cosgrove, 2009). A recent paper shows that auxin, a known modulator  
115 of plant growth that has opposite effects on root or shoot growth (inhibition and  
116 stimulation, respectively), constricts vacuolar shape in long-term treatments (6+ h) on  
117 root cells, and does so by inducing altered actin arrays (Scheuring et al., 2016).  
118 Although this work describes the long-term effects of auxin on actin (Scheuring et al.,  
119 2016), what connects short-term auxin treatments with actin rearrangements is not  
120 understood. Interactions between auxin signaling pathways and actin are abundant in  
121 the literature (reviewed in Zhu and Geisler, 2015), but the mechanics of how the  
122 hormone affects the cytoskeleton on a timescale of minutes, and how these interactions  
123 stimulate or inhibit growth, are largely unknown.

124 The molecular players that connect the actin cytoskeleton to auxin perception  
125 during short-term responses are unidentified. Auxin reception by AUXIN BINDING  
126 PROTEIN 1 (ABP1) was previously suspected to be upstream of cytoskeletal changes

127 in both roots (Chen et al., 2012; Lin et al., 2012) and epidermal pavement cells (Xu et  
128 al., 2010; Nagawa et al., 2012; Xu et al., 2014); however, recent works demonstrate that  
129 a CRISPR *abp1-c1* mutant exhibited root growth inhibition in the presence of both the  
130 known root growth inhibitor, the auxin indole-3-acetic acid (IAA) and the membrane  
131 permeable auxin 1-naphthylacetic acid (NAA), just like wildtype plants, indicating that  
132 ABP1 likely does not play a significant role in auxin signaling (Dai et al., 2015; Gao, et  
133 al., 2015). AUXIN RESISTANT 1 (AUX1) is a plasma membrane-bound auxin/H<sup>+</sup>  
134 symporter in the Amino acid/auxin permease (AAP) family that is ubiquitous among  
135 Eukaryotes. AUX1 appears to be present in all plants as well as some algae, indicating  
136 that the protein likely evolved before land plants (reviewed in Swarup and Péret, 2012).  
137 Unlike wildtype, *aux1* plants grow in the presence of, IAA but undergo growth inhibition  
138 by NAA (Marchant et al., 1999), and AUX1 binds both IAA and NAA with high affinity  
139 (Yang et al., 2006; Carrier et al., 2008) and is responsible for 80% of IAA uptake by root  
140 hairs (Dindas et al., 2018). AUX1 contributes to short-term, auxin-induced increases in  
141 cytosolic H<sup>+</sup> and, together with the intracellular auxin receptor complex SCF<sup>TIR1/AFB</sup>,  
142 increases in cytosolic Ca<sup>2+</sup> (Dindas et al., 2018). The auxin molecule itself is the signal  
143 that SCF<sup>TIR1/AFB</sup> perceives (Dharmasiri et al., 2005a,b; Kepinski and Leyser, 2005),  
144 driving both rapid increases in Ca<sup>2+</sup> (Dindas et al. 2018) and transcriptional  
145 reprogramming (Ulmasov et al., 1999).

146 To correlate actin arrays with degree of cell expansion, we used quantitative  
147 tools to establish a baseline of actin architecture and orientation and individual filament  
148 behaviors in root epidermal cells under control circumstances. By plotting  
149 measurements of each cell's actin array against its length, we found that cell length was

150 highly predictive of actin array. We then used acute treatments with IAA to determine  
151 the actin response in presumed non- or very slow-growing cells and documented the  
152 first short-term actin responses to these growth-inhibitory doses of IAA. Upon analyzing  
153 the actin arrays in two *aux1* alleles (the T-DNA insertion mutant *aux1-100* and the null  
154 point mutant *aux1-22*), we found that actin failed to reorganize in response to IAA and  
155 actin reorganization was only partially restored by NAA. Our data substantiate that  
156 AUX1 and cytosolic auxin play a significant role upstream of actin reorganization in  
157 auxin signaling.

## 158 **RESULTS**

### 159 **Actin Organization Correlates with Cell Length**

160 Actin organization in living epidermal cells of the root elongation zone, examined with  
161 variable angle epifluorescence microscopy (VAEM), displayed a consistent pattern of  
162 organization (Baluška et al., 1997; Figure 1A, Supplemental Figure 1A). The actin array  
163 in thin, rectangular cells closest to the root apex—the root cap—comprised haphazardly  
164 arranged bundles. About 200  $\mu\text{m}$  from the apex, in short, square cells emerging from  
165 under the root cap, there appeared to be a marked increase in the abundance of actin  
166 filaments, with fewer bundles. Array organization appeared to become gradually more  
167 bundled, longitudinal, and sparse as cells increased in length, until reaching the end of  
168 the root elongation zone (a demarcation indicated by the first visible root hair initiations).  
169 Although this pattern has been observed previously (Baluška et al., 1997; Baluška and  
170 Mancuso, 2013), we wondered whether there were quantitative differences in actin  
171 organization that could be correlated with cell size, and, potentially, with developmental  
172 stage. After plant cells are generated in the root meristem, they spend approximately

173 4 d progressing through the meristematic region (including the root transition zone)  
174 before progressing to the zone of rapid elongation, where they spend mere hours  
175 (Beemster and Baskin, 1998, 2000; van der Weele et al., 2003). The consistent  
176 progression of aging, growing cells allows comparison and quantification of actin arrays  
177 in cells in both the slower-growing late meristematic/transition zone and the zone of  
178 rapid elongation. Whether actin bundles inhibit (Gilliland et al., 2003; Holweg et al.,  
179 2004; Rahman et al., 2007) or promote (Kandasamy et al., 2009; Yang et al., 2011; Li et  
180 al., 2014a) cell expansion remains controversial. We hoped to gain insight into the role  
181 of actin bundling in expansion of root epidermal cells, since it is the root epidermis that  
182 drives cell expansion in all root layers (Savaldi-Goldstein et al., 2007 [shoots]; Hacham  
183 et al., 2011).

184 To test quantitatively whether actin array organization varies over the course of  
185 the root, we took overlapping VAEM images of GFP-fABD2-labeled (green fluorescent  
186 protein fused to the second actin-binding domain of Arabidopsis FIMBRIN1) actin  
187 filaments from the root apex through the end of the elongation zone. The demarcation  
188 between the root cap (here called “Region 1”) and what appeared to be the visible  
189 transition zone (here called “Region 2”) was drastic. Isotropic cells that delineate the  
190 late meristematic/early transition zone clearly emerge from under the rectangular cells  
191 of the presumed root cap. The distinction between Region 2 and what we call  
192 “Region 3” was not nearly so definitive as between Region 1 and Region 2, so we first  
193 delineated Region 3 by an observable decrease in actin filament abundance  
194 (admittedly, a subjective criterion). Representative images showed conspicuous  
195 differences in actin arrays in Region 2 and Region 3 (Figure 1B; Region 1, i.e., the root



196 cap, in Supplemental Figure 1A). Aspects of actin organization were quantified as  
197 described previously (Higaki et al., 2010b; Ueda et al., 2010; Henty et al., 2011; Li et al.,  
198 2012; Cai et al, 2014; Cao et al., 2016). Parameters measured include: percent  
199 occupancy or density, the extent of bundling of actin filaments (measured as  
200 “skewness” of pixel intensity distribution in an image), parallelness of filaments to each  
201 other, and average filament angle relative to a cell’s longitudinal axis (Higaki et al.,  
202 2010b; Ueda et al., 2010; Henty et al., 2011; Li et al., 2012; Cai et al, 2014; Cao et al.,  
203 2016). These quantitative analyses showed (Supplemental Figure 1B–E) the cortical  
204 actin array in root Region 2 was significantly more dense and less bundled than  
205 Region 3 (longer cells closer to the first visible root hair initiations). Region 1 was similar  
206 in density to Region 2, but more bundled. The filaments and bundles in cells of Region 3  
207 were substantially more longitudinal than those in Region 1 or Region 2. Since cells of  
208 the root cap do not follow in the same cell files as Regions 2 and 3 and do not follow the  
209 same cell expansion gradient, and since we sought to learn about differences in actin  
210 organization over the course of cell expansion, we eliminated Region 1 from further  
211 analysis.

212 Because of the substantial differences in actin organization among epidermal  
213 cells within the elongation zone, we hypothesized that if certain actin arrays correlate  
214 with expanding cells, cell size should predict actin organization and vice versa. A root  
215 cell’s shape (length and width) or its actin array should correctly place the cell at a  
216 certain point in the expansion gradient of the elongation zone. While cell width could not  
217 predict any of the actin measurements—there was no predictive relationship between  
218 cell widths and actin filament density, skewness, angle, or parallelness (Figure 1C;

219 Supplemental Figure 2)—cell lengths were highly predictive of each actin metric, using  
220 the descriptive statistical analysis bivariate fit (Figure 1D–G; Supplemental Figure 3).  
221 Short cells exhibited higher actin density (Figure 1D), lower bundling (Figure 1E), and  
222 what might be perceived as “disorganized” actin, with higher average filament angles  
223 (Figure 1F) and lower parallelness (Figure 1G) compared with long cells. These highly  
224 predictive relationships between cell length and each aspect of actin organization held  
225 when we examined actin organization in the Wassilewskija (WS) ecotype expressing  
226 GFP-fABD2 and in a T-DNA insertion mutant for the auxin transport protein AUX1  
227 (*aux1-100*, WS background; Supplemental Figure 7), whose average root epidermal cell  
228 lengths are significantly longer than either wildtype. Although we were unable to  
229 accurately and consistently measure cell growth rates (based on literature such as  
230 Beemster and Baskin, 1998; van der Weele et al., 2003), and so have not determined  
231 whether bundles promote or even precede expansion, it is clear that a higher incidence  
232 of actin bundling occurred in long cells (Supplemental Figures 3, 7, and 9).

233 The parameter that adhered to a fairly linear relationship with cell length is  
234 parallelness ( $R^2 = 0.68$ ; Figure 1G; Supplemental Figure 3D)—how parallel filaments  
235 are to each other. Although these data cannot establish increased filament parallelness  
236 as the cause of cell elongation, they demonstrate that filament parallelness is the  
237 parameter most directly correlated with cell length. To determine whether any particular  
238 combination of the measured parameters (cell length, cell width, filament density,  
239 skewness, angle, and parallelness) explains the most variance from the mean for each  
240 cell, we performed principal component analysis on each data set, finding that the  
241 interactions between cell length, filament parallelness, and to a lesser extent, skewness,

242 explain most of our observations for both wildtype ecotypes (Col-0 and WS) and the  
243 *aux1-100* mutant (see Supplemental Tables 1–6).

244         Aside from investigating correlations between actin organization and cell size,  
245 our intent was to find a more objective way of categorizing cells into “Region 2” or  
246 “Region 3” for wildtype plants. By plotting each cell’s specific actin metrics against its  
247 length or width, we defined maximum cell sizes for each region. The maximum length of  
248 a cell included as Region 2 became 85  $\mu\text{m}$ , the mean cell length (57  $\mu\text{m}$ ) plus one  
249 standard deviation (28  $\mu\text{m}$ ); the minimum length of a cell included as Region 3 became  
250 94  $\mu\text{m}$ , the mean cell length (128  $\mu\text{m}$ ) minus one standard deviation (34  $\mu\text{m}$ ). These  
251 cutoffs were used in assigning “region” in all further experiments on the  
252 Col-0;GFP-fABD2 lines (see Methods).

### 253 **Cortical Actin Array Dynamics and Individual Filament Behaviors Differ between** 254 **Short and Long Cells**

255 Cortical actin arrays constantly remodel depending on the needs of a cell (Staiger et al.,  
256 2009; Henty et al., 2011; Henty-Ridilla et al., 2013; Henty-Ridilla et al., 2014; Cao et al.,  
257 2016). Arrays in isotropically-growing cotyledon pavement cells are observed to exhibit  
258 “more random” and “more dynamic” arrays than the anisotropically-growing cells of the  
259 root elongation zone (Smertenko et al., 2010). We hypothesized that the actin network  
260 in cells in Region 3 would be less dynamic than in Region 2. We collected 100-s  
261 timelapse movies from short and long cells in the same roots and calculated the  
262 pairwise correlation coefficient among all possible temporal intervals (Vidali et al.,  
263 2010). We found that the actin array dynamicity in Region 2 cells was significantly  
264 reduced compared to Region 3 (Supplemental Figure 4). The array of Region 2 cells

265 was very dense, so we considered that a general comparison of pixel intensities and  
266 occupancies among temporal intervals of timelapse movies might not account for the  
267 true dynamic behavior of the array.

268 To determine what specific behaviors contribute to the overall filament array in  
269 cells, we quantified individual actin filament behaviors (Li et al., 2015b). We expected  
270 increased turnover in short cells and a higher frequency of bundling events in long cells.  
271 On average, filaments in short and long cells behaved similarly, except that longer cells  
272 exhibited longer, faster-growing filaments (Figure 2; Table 1). Upon measuring bundling,  
273 unbundling, and annealing frequencies, we were surprised to observe no differences in  
274 frequency of bundling or unbundling, but there was a multifold increase in annealing in  
275 shorter cells (Figure 2; Table 1).

## 276 **Actin Organization Responds to Short-Term IAA Treatments**

277 To decipher which actin parameter(s) coincided with cell expansion, and to find stronger  
278 indicators of causality, we treated roots with a known inhibitor of root growth, the  
279 naturally occurring auxin, IAA, which has been shown to inhibit root growth within  
280 minutes of application (Hejnowicz and Erickson, 1968; Fendrych et al., 2018). Auxin  
281 affects actin organization and dynamics and inhibits root growth (reviewed in Zhu and  
282 Geisler, 2015; Fendrych et al., 2018), known to depend on an intact cytoskeleton  
283 (reviewed in Hussey, 2006 and Li et al., 2015a). Yet, actin response following short-  
284 term auxin treatments, i.e., a way to directly link the two, has not been determined. If  
285 decreased actin density and increased bundling are indeed hallmarks of growth, and if  
286 auxin works by modulating the actin cytoskeleton, then IAA, an agent that inhibits  
287 growth, should induce the opposite actin phenotype: after IAA treatment, density should

288 increase and bundling decrease. Further, if a lower average filament angle and higher  
289 parallelness are indicative of rapidly growing cells (described in Dyachok et al., 2011,  
290 and a natural assumption given that we found increasingly longitudinal actin arrays in  
291 longer cells), applying IAA should increase filament angle and decrease parallelness  
292 (i.e., there should be a decrease in both longitudinality and apparent “organization”).

293 As expected, 20–30 min IAA treatments induced significant increases in actin  
294 filament density and decreases in extent of bundling (Figure 3), linking actin abundance  
295 and a reduction in bundling with plant response to IAA. We were surprised, however, to  
296 observe a dose-dependent increase in apparent actin organization after IAA treatments  
297 (Figure 3A,D–E, Supplemental Figure 5). In another, time series experiment, we  
298 established that the IAA-induced increase in parallel longitudinality is maintained for at  
299 least 60 min after initial treatment (Supplemental Figure 6). Strong changes in filament  
300 angle and orientation generally appeared more slowly than the increase in density.  
301 Together, these are the first data that quantitatively document actin’s short-term  
302 response to moderate doses of IAA.

### 303 **Actin Filaments Unbundle in Response to IAA**

304 Links between auxin and actin clearly exist (reviewed in Zhu and Geisler, 2015) but the  
305 specific components of these pathways—and actin’s role in them—are unresolved, so  
306 we evaluated actin’s role in IAA perception by measuring whether individual filament  
307 behaviors change in the minutes immediately following IAA treatment.

308 Since substantial increases in actin density and parallel longitudinality occurred  
309 within 20–30 min of treatment with IAA, we hypothesized that individual filaments would  
310 respond quickly to treatment and might undergo increased severing, faster filament

311 elongation rates, increased unbundling, and/or increased annealing (a result of  
312 decreased end-capping; Li et al., 2012). We tested this prediction by quantifying actin  
313 dynamics in epidermal cells in Region 2 and Region 3 within 7 min of 10 nM IAA  
314 treatment. Surprisingly, we observed no changes in most individual filament behaviors  
315 in either shorter or longer cells within this 7-min timeframe (Table 2). Though the  
316 differences in filament elongation rates and maximum filament length we previously  
317 observed between regions (Table 1) were reproduced, 10 nM IAA did not affect any of  
318 the measured stochastic dynamics parameters: overall filament length, lifetime,  
319 elongation rate, or severing frequency within a region. However, when we measured  
320 frequency of bundling, unbundling, and annealing, we observed an IAA-induced  
321 doubling of unbundling events in both short and long cells (Figure 4, Table 2). In long  
322 cells, IAA induced a near 5-fold increase in annealing (Figure 4D, Table 2). Actin  
323 filaments unbundled and altered annealing frequencies within 7 min of IAA treatment,  
324 demonstrating that actin participates in short-term responses to the hormone.

## 325 **The Actin Array in *aux1* Mutants is Insensitive to IAA but Partially Responds to** 326 **NAA**

327 The auxin importer AUX1 was identified in an ethyl methanesulphonate (EMS) mutant  
328 screen for resistance to IAA and 2,4-D (Maher and Martindale, 1980; Pickett et al.,  
329 1990), and the protein has been shown to bind IAA with extremely high affinity (Yang et  
330 al., 2006; Carrier et al., 2008). AUX1 mutants are agravitropic and exhibit root  
331 elongation in the presence of the natural auxin IAA (whereas wildtype roots are growth-  
332 inhibited under this condition), but mutant root growth is inhibited to wildtype levels in  
333 the presence of the membrane permeable auxin NAA (Maher and Martindale, 1980;

334 Pickett et al., 1990; Bennett et al., 1996; Marchant et al., 1999). Cells in *aux1* mutants  
335 take up significantly less IAA (Rashotte et al., 2003; Hayashi et al., 2014; Rutschow et  
336 al., 2014, protoplasts; Dindas et al., 2018) and are larger compared with wildtype cells  
337 (Ugartechea-Chirino et al., 2010; Supplemental Figures 7 and 9). Intracellular auxin  
338 concentrations correlate with cell length, where IAA concentrations are higher in longer  
339 root epidermal cells (Brunoud et al., 2012), possibly because IAA concentration  
340 regulates the amount of time cells spend in the elongation zone (Rahman et al., 2007).  
341 We hypothesized that AUX1 might have a previously uncharacterized role in short-term  
342 auxin signaling to the cytoskeleton.

343 We expressed GFP-fABD2 in the T-DNA insertion mutant for AUX1, *aux1-100*  
344 (WS background) and in the point mutant *aux1-22* (Col-0 background; Feldmann, 1991;  
345 Roman et al., 1995; Bennett et al., 1996), with the hypothesis that if AUX1 were  
346 upstream of cytoskeletal rearrangements in response to IAA, the mutants' actin  
347 cytoskeleton would not respond to 20–30 min IAA treatments: neither density nor  
348 parallelness would increase, and neither skewness nor average filament angle would  
349 decrease. Because root epidermal cells in *aux1* plants were significantly longer than  
350 wildtype (Supplemental Figures 7 and 9), analyzing actin response by separating cells  
351 into standard “regions” seemed imprecise. For example, a 120  $\mu\text{m}$ -long cell that will  
352 grow to a final length of 140  $\mu\text{m}$  in a wildtype plant is at a different point in its  
353 development than a 120  $\mu\text{m}$ -long *aux1-100* cell that will reach a final length of 290  $\mu\text{m}$ .  
354 Therefore, we quantified changes in actin array on a per cell basis (see Methods).

355 Both *aux1* mutants had average cell lengths longer than wildtype, as well as  
356 overall actin array organization that differed from wildtype under control conditions

357 (Figure 5 and Supplemental Figures 7, 8, and 9). When each mutant was compared to  
358 its respective wildtype ecotype, both alleles of *aux1* exhibited significantly lower average  
359 filament density and increased skewness/bundling. Filaments were overall more  
360 longitudinal and parallel to one another. Mutants' longer cells and "more organized"  
361 actin filament organization fits the model that higher levels of apparent "organization"  
362 are coincident to cell expansion.

363 Actin organization in wildtype WS plants expressing GFP-fABD2 responded to  
364 short-term IAA treatments almost identically as had Col-0. Actin filament density  
365 significantly increased, as did parallelness, and average filament angle significantly  
366 decreased (Figure 5). Interestingly, when actin response was quantified on a per cell  
367 basis, WS did not exhibit the small but statistically significant decrease in  
368 skewness/bundling (Figure 5E and Supplemental Figure 7) that we had previously  
369 observed in Col-0 (Figure 3), perhaps because the ecotype itself is slightly resistant to  
370 auxin (Dharmasiri et al., 2005b). The *aux1-100* mutant's actin array did not significantly  
371 reorganize in response to IAA treatment (Figure 5), indicating that actin cytoskeleton  
372 response to IAA required the transporter. To confirm the importance of AUX1 in IAA-  
373 triggered actin cytoskeleton rearrangements, we tested a second allele, the null point  
374 mutant *aux1-22*. The actin array in *aux1-22* also failed to reorganize in response to IAA  
375 treatments (Supplemental Figure 8).

376 To understand whether the auxin hormone itself drives cytoskeletal  
377 reorganization, or if there is an intermediary between auxin, AUX1, and actin response,  
378 we tested the mutant's response to the membrane permeable auxin NAA. If AUX1's role  
379 is restricted to transporting IAA into the cell and auxin itself merely needs to enter the



380 cell to stimulate actin reorganization, NAA should be sufficient to induce a wildtype  
381 response in *aux1-100* and we should see denser, more parallel, and more longitudinal  
382 arrays. But if NAA should fail to induce the established reorganization pattern, we could  
383 deduce that the presence of auxin inside the cell is not enough and that the AUX1  
384 protein is required for short-term auxin to actin signaling. Figure 5 shows that WS  
385 responds to NAA similarly as to IAA. Interestingly, NAA only partially restores in  
386 *aux1-100* a wildtype response to IAA. NAA stimulates increased actin filament density  
387 (Figure 5D) in the mutant, but has no effect on filament angle or parallelness  
388 (Figures 5F–G).

389 To confirm AUX1's importance in cytoskeletal responses to NAA, we tested the  
390 membrane permeable hormone's effects on actin organization in *aux1-22* and its  
391 wildtype, Col-0. Recapitulating *aux1-22*'s lack of response to IAA, actin organization in  
392 this mutant was largely impervious to NAA, with a sizeable but statistically insignificant  
393 reduction in average filament angle. Upon testing the effect of NAA on actin  
394 reorganization in Col-0, we found that NAA stimulated an increase in actin filament  
395 density in Col-0, but were surprised that, when measured on a per cell basis, Col-0  
396 exhibited neither a decrease in average filament angle nor an increase in filament  
397 parallelness (Supplemental Figure 8). The Col-0 and WS ecotypes are likely genetically  
398 divergent enough to explain why their NAA-prompted actin reorganization is not  
399 identical; indeed, previous work identified transcriptional responses for several genes  
400 that differ among the two ecotypes under various environmental conditions, including for  
401 other proteins involved in hormone signaling (Schultz et al., 2017). Actin organization in  
402 both *aux1-100* and *aux1-22* failed to respond to IAA and only partially responded to

403 NAA. These results are the first that place AUX1 upstream of actin in short-term auxin  
404 signaling events, as well as demonstrate that the import protein is required for a  
405 complete actin response to auxin.

## 406 **DISCUSSION**

407 We correlated specific actin architecture and orientation to cell lengths in expanding root  
408 epidermal cells and report the first quantitative assessment of actin responses to short-  
409 term IAA treatments in roots. Under control conditions, short epidermal cells (Region 2)  
410 are characterized by dense actin arrays with high annealing frequencies, whereas long  
411 cells (Region 3) exhibit more bundled, more parallel, more longitudinal actin arrays in  
412 which filaments elongate faster and grow longer. We found that this same pattern of  
413 actin organization occurs in the WS ecotype and *aux1* mutants, indicating that there  
414 may be a causal relationship among cell length, skewness/bundling, and filament  
415 parallelness. We documented actin responses to growth-inhibitory doses of IAA and  
416 were surprised to find that filaments became more dense, parallel, and longitudinally  
417 oriented (i.e., lower average filament angle) within 20–30 min, demonstrating that the  
418 relationship between higher levels of actin “organization” and increased cell expansion  
419 is not as direct as previously hypothesized. Upon analyzing the actin array response to  
420 auxin in two *aux1* mutants (the T-DNA insertion mutant *aux1-100* and the null point  
421 mutant *aux1-22*), we found that actin failed to reorganize in response to IAA and actin  
422 reorganization was only partially restored by NAA. Although none of our results  
423 establishes a cause-and-effect relationship between increased actin bundling and  
424 elongating cells, they disprove the hypothesis that actin bundles inherently inhibit cell  
425 expansion. Although some specific actin characteristics correlate with longer cells,

426 “more organized” filament arrays do not universally correlate with rapidly growing root  
427 cells. We also provide the first evidence that the auxin import protein AUX1 is critical for  
428 the actin cytoskeleton’s full response to short-term auxin treatments, presumably  
429 because it imports the bulk of IAA into cells, and that cytoplasmic auxin is sufficient to  
430 trigger some aspects of actin reorganization.

431 Studies on the long-term (6+ hours) effects of high doses of auxin on actin  
432 filaments (Li et al., 2014a; Scheuring et al., 2016) report that actin becomes more  
433 bundled after treatment. Several studies (Holweg et al., 2004; Nick et al., 2009)  
434 examining the effect of short-term, high dose IAA treatments on m-Talin–bundled actin  
435 filaments in dark-grown rice coleoptiles demonstrate that relatively high doses of auxin  
436 (10  $\mu$ M NAA, or 50  $\mu$ M IAA) induced filament unbundling. Auxin transport inhibitors  
437 appear to have the opposite effect on actin filaments. Auxin transport inhibitors such as  
438 2,3,5-triiodobenzoic acid (TIBA) induce actin bundling within minutes (Dhonukshe et al.,  
439 2008) and inhibit cell elongation (Rahman et al., 2007). Here, we demonstrated that  
440 short-term treatment with IAA, closer to endogenous levels (Band et al., 2012), induced  
441 an increase in filament density, parallelness, and longitudinality, and decrease in  
442 bundles within 20–30 min, as well as an increase in unbundling events in cells  
443 throughout the visible root elongation zone within 7 min (Table 2). These results indicate  
444 that, like their role in microbe-associated molecular pattern (MAMP) perception  
445 (Cárdenas et al., 1998; Henty-Ridilla et al., 2014; Li et al., 2015b), actin filaments are  
446 potentially involved in the initial intracellular perception of IAA. Interestingly, unbundling  
447 actin filaments to build a dense array in auxin signaling/response is a different cellular  
448 mechanism used to increase filament density vs. the increased density observed in

449 responses to MAMPs in Arabidopsis hypocotyls, where MAMPs inhibit actin  
450 depolymerizing factor (ADF)-mediated severing and downregulate capping protein- (CP)  
451 mediated barbed end capping to build a denser array (Henty-Ridilla et al., 2014; Li et  
452 al., 2014b). This indicates that, despite similar actin readouts of “increased density” after  
453 MAMP or 20 min IAA treatment, actin participates in discrete roles in each of these  
454 signaling–response pathways, and each stimulus distinctly modulates actin regulation  
455 towards separate, precise outcomes.

456 We found that the auxin import protein AUX1 is required for short-term changes  
457 in actin organization in response to auxin. Previously the role of “auxin receptor” was  
458 attributed to ABP1 (Chen et al., 2001; Chen et al., 2012; Lin et al., 2012; Nagawa et al.,  
459 2012; reviewed in Sauer and Kleine-Vehn, 2011), but immediate cytoskeletal  
460 reorganization was never directly linked to the protein because though actin response in  
461 roots was implied (Lin et al., 2012), it was never directly visualized. The *aux1* mutants’  
462 actin arrays are impervious to IAA, likely because auxin cannot enter cells in sufficient  
463 quantities, and are only partially responsive to the membrane-permeable NAA,  
464 indicating that while auxin itself elicits some actin rearrangements, AUX1 is necessary  
465 for full response. Having an established baseline of auxin’s short-term effects on actin  
466 filaments in wild-type and *aux1* root epidermal cells will enable further testing of models  
467 of actin’s role in auxin signaling pathways.

#### 468 **Actin Organization Predicts Cell Length Under Control Conditions but Not** 469 **Otherwise**

470 Actin’s role in cell expansion is established but not understood (reviewed in Li et al.,  
471 2015a). It has been generally accepted that cell expansion requires a degree of

472 observable actin “organization” (Smertenko et al., 2010; Dyachok et al., 2011). The  
473 hypothesis that an “organized” actin array corresponds with cell growth appeals to an  
474 intuitive understanding of growth as a methodical process that requires coordinated  
475 elements. However, “organization” can take many forms and exactly what form drives  
476 growth is unknown. Indeed, we found in two ecotypes—and in an auxin signaling  
477 mutant with significantly longer cells—that filament parallelness, cell length, and  
478 skewness affect one another to a similar extent to produce predictable organization  
479 across the root elongation zone. By showing that, under control conditions, actin  
480 bundling increases as cell length increases, we present definitive evidence that filament  
481 bundles do not inhibit cell expansion. Our observation, substantiated by quantitative  
482 evidence, that the cytoskeleton changes to a higher level of apparent actin  
483 “organization”, namely longitudinality and filament parallelness, in response to IAA, a  
484 treatment known to inhibit growth within minutes (Hejnowicz and Erickson, 1968;  
485 Fendrych et al., 2018), definitively demonstrates that increases in filament  
486 “organization” do not, inherently, contribute to cell expansion. Furthermore, the IAA-  
487 induced decrease in overall filament bundling (Figure 3c) and increase in unbundling  
488 events (Table 2) that occurs in Col-0 indicates that an absence of longitudinal bundling  
489 does not necessarily coincide with expanding cells. Thus, although our data cannot  
490 divulge a cause-and-effect relationship, our correlative study has eliminated two  
491 hypotheses for the relationship between actin organization and cell expansion and  
492 determined that there is no absolute relationship between actin bundling and cell  
493 expansion.

494 **Actin Behaviors Differ in Short and Long Epidermal Cells of the Root Elongation**  
495 **Zone**

496 We evaluated individual filament behaviors in short and long cells to gain insight into  
497 what filament behaviors might contribute to cell growth. Although several aspects of  
498 individual filament dynamics were previously measured in root epidermal cells in  
499 Arabidopsis (Smertenko et al, 2010), we have examined additional filament behaviors,  
500 bringing knowledge of Arabidopsis up to that of rice (Wu et al., 2015). Region 2 was  
501 significantly denser than Region 3 so we expected a higher rate of filament turnover:  
502 increased severing, shorter filaments and filament lifetimes, and faster elongation rates.  
503 Filament arrays in Region 3's longer cells were much more bundled than arrays in  
504 Region 2 so it was reasonable to expect either a higher bundling frequency in longer  
505 cells, a higher incidence of unbundling in shorter cells, or a lower incidence of  
506 unbundling in longer cells. In this study, both short and long cells exhibited similar  
507 individual filament behaviors (Table 1), the only major differences being a reduced  
508 maximum filament length and elongation rate in shorter cells, and a multifold increase in  
509 incidents of annealing in shorter cells. In etiolated hypocotyls, increased filament  
510 lengths and lifetimes correlate with longer cells (Henty-Ridilla et al., 2013; Li et al.,  
511 2014b). Although shorter root epidermal cells have shorter average filament lengths,  
512 lifetime is statistically equivalent to that of filaments in longer cells, demonstrating that  
513 the connection between longer lifetime and increased cell length is not evident in roots.

514 The most marked difference in individual filament behaviors between short cells  
515 and long cells was the up to-10-fold increase in annealing frequency observed in  
516 shorter cells. Although the correlation coefficient algorithm found Region 2 to be less

517 dynamic than Region 3, pixels occupied by fluorescence do not change as much during  
518 annealing events as, for example, when an entirely new filament polymerizes, so it is  
519 possible that this method failed to capture the full range of dynamic behaviors in Region  
520 2 cells' actin arrays. The substantial increase in annealing on a per-filament basis  
521 indicates there is likely a purpose behind this phenomenon. Annealing in vitro is  
522 generally a function of actin concentration, filament length, and/or filament end  
523 availability (Adrianantoandro et al., 2001), and in vivo is down-regulated by capping  
524 protein (Henty-Ridilla et al., 2014; Li et al., 2014b). Annealing is a way to build filaments  
525 quickly and without intensive energy inputs (Smertenko et al., 2010; Li et al., 2014b).  
526 Since maximum filament length is reduced in shorter cells that have a higher annealing  
527 frequency compared with maximum filament length in longer cells, and since these  
528 seem to be transient annealing events that for the most part hold for only a few frames,  
529 the purpose of these events does not appear to be building longer filaments. Perhaps  
530 these shorter cells, which are located in the subsection of the elongation zone known as  
531 the transition zone, are undergoing more cytoplasmic changes in preparation for rapid  
532 elongation.

### 533 **AUX1 is Necessary for Actin Response to Auxin**

534 It is well-established that signaling between auxin and actin occurs (Kleine-Vehn and  
535 Friml, 2008; Nick et al., 2009; Nick, 2010; Lin et al., 2012; Nagawa et al., 2012; Li et al.,  
536 2015a; Scheuring et al., 2016; Zhu et al., 2016), but how auxin affects growth, how  
537 auxin affects actin, and how auxin affects actin to influence cell expansion are far from  
538 being understood. The multiple auxin–actin pathways (reviewed in Overvoorde et al.,  
539 2010 and Grones and Friml, 2015) assign various roles to actin in auxin response (for

540 example, repositioning auxin transport proteins, or inhibiting endocytosis of auxin  
541 transporters), and the pathway thought to link auxin and actin in the very short-term was  
542 via the plasma membrane auxin receptor ABP1 (Xu et al., 2010, 2011; Nagawa et al.,  
543 2012). Now that ABP1's role in auxin–actin signaling is in doubt (Dai et al., 2015; Gao et  
544 al., 2015), the mechanism of auxin–actin signaling and how actin rapidly perceives  
545 auxin—through an upstream receptor, second messenger(s) modulating actin binding  
546 proteins, and/or perhaps direct interaction with the hormone itself—remains  
547 undetermined.

548         Before this current work, AUX1 was not suspected of playing a “transceptor” role  
549 in signaling upstream of actin organization. AUX1 is an established transporter of auxin  
550 (Bennett et al., 1996; Dindas et al., 2018), has homologs in all plants (reviewed in  
551 Swarup and Péret, 2012), is necessary for root gravitropism (Maher and Martindale,  
552 1980; Marchant et al., 1999; Swarup et al., 2004), and is responsible for 80% of IAA  
553 uptake in root hairs (Dindas et al., 2018) and rapid growth inhibition by IAA (Fendrych et  
554 al., 2018). Auxin-induced transcriptional regulation requires that auxin binds to the  
555 intracellular auxin receptors SCF<sup>TIR1/AFB</sup>, which complex then binds to AUXIN/INDOLE-  
556 3-ACETIC ACID (Aux/IAA) transcriptional repressors (Dharmasiri et al., 2005a,b;  
557 Calderón Villalobos et al., 2012). However, the SCF<sup>TIR1/AFB</sup> pathway is also responsible  
558 for short-term intracellular responses to auxin. Within the first 10 min of receiving an  
559 auxin signal, there is both an initial influx of H<sup>+</sup> (depolarizing the plasma membrane and  
560 reducing cytosolic pH) and, shortly thereafter, increased intracellular Ca<sup>2+</sup> that  
561 propagates through the root (Dindas et al., 2018). Both IAA and NAA are substrates of  
562 AUX1 (Yang et al., 2006; Carrier et al., 2008), and of the SCF<sup>TIR1/AFB</sup>–Aux/IAA complex,



563 though both AUX1 and the protein complex have a higher affinity for IAA (Dharmasiri et  
564 al., 2005b; Calderón-Villalobos et al., 2012; Dindas et al., 2018).

565 Actin in wildtype cells reorganizes to increase filament density in response to  
566 both IAA and NAA. Surprisingly, NAA stimulated different effects on actin reorganization  
567 in Col-0 and WS: WS responded to NAA as it had to IAA but Col-0 underwent only  
568 increased actin filament density, and no changes in parallel longitudinality at 20–30 min.  
569 Col-0 might respond to NAA on a timeframe different from WS and different from its  
570 response to IAA. Natural and synthetic auxins inhibit root elongation to different extents,  
571 depending on ecotype (Delker et al., 2010). Occasionally differential responses to NAA  
572 have been detected across ecotypes, for example NAA stimulates a higher number of  
573 lateral roots in 9-day-old Col-0 plants compared with WS or Landsberg erecta (Falasca  
574 and Altamura, 2003). In addition, IAA and NAA induce in Col-0 different extents of gene  
575 expression (Yoshimitsu et al., 2011). It is quite possible that the two ecotypes are more  
576 different than is commonly acknowledged, a subject that merits further study.

577 Actin reorganization in both alleles of *aux1* was resistant to IAA and exhibited  
578 only partial responses to NAA, implicating AUX1 as a major player in auxin signaling to  
579 actin. After NAA treatments, density increased only in *aux1-100* and angle decreased  
580 (although not statistically significantly) only in *aux1-22*. Our results that show attenuated  
581 actin reorganization in *aux1-100*'s and *aux1-22*'s responses to NAA support the Dindas  
582 et al. (2018) model of an intracellular feedback loop that relies on the presence of  
583 AUX1. In the *aux1* mutant *wav5-33*, NAA triggers membrane depolarization (at a level  
584 similar to wildtype) and H<sup>+</sup> influx (though substantially delayed and reduced vs.  
585 wildtype), but all *aux1* mutants tested are severely or entirely resistant to IAA in these

586 responses (Dindas et al., 2018). Nor does IAA treatment in *aux1* mutants lead to the  
587 typical increased  $\text{Ca}^{2+}$  and although NAA was not directly tested (Dindas et al., 2018),  
588 these results imply that NAA might not induce  $\text{Ca}^{2+}$  influx in *aux1* mutants. Both  $\text{H}^+$ ,  
589 which contributes to membrane depolarization, and  $\text{Ca}^{2+}$  are known regulators of  
590 various actin binding proteins (see below). It is possible that import of IAA through  
591 AUX1 is necessary to activate or inhibit other intracellular players which drives,  
592 separately, increased actin density, decreased filament angle, and increased  
593 parallelness. Alternatively, actin reorganization might be delayed in the mutants. In any  
594 case, that previous study (Dindas et al., 2018) and our data showing partial actin  
595 response to NAA in *aux1* mutants demonstrate that auxin itself can act as an  
596 intracellular signaling molecule that stimulates some short-term cellular responses, a  
597 deviation from the ABP1 model that relied on IAA being perceived at the plasma  
598 membrane and its signal amplified within the cell.

599

## 600 **Potential Players in the Actin–Auxin Connection**

601 Long-term (6+ h) auxin responses have been shown in rice to rely on the actin binding  
602 protein RMD (Rice Morphology Determinant; FORMIN5, homolog of Arabidopsis  
603 FORMIN14), which is downstream of auxin response factors (Zhang et al., 2011; Li et  
604 al., 2014a). Less is known about auxin's effect on actin during cellular activities that  
605 occur on the order of minutes such as polarized growth or gravitropism (Xu et al., 2014;  
606 Zhu et al., 2015). Substantial membrane depolarization, slight acidification of cytosol (in  
607 conjunction with significant alkalinization of extracellular pH), and significant but  
608 transient increases in cytosolic  $\text{Ca}^{2+}$  are short-term intracellular responses that were  
609 shown to occur independent of transcriptional responses and are AUX1-dependent  
610 (Monshausen et al., 2011; Dindas et al., 2018). Actin binding proteins that are known to  
611 be modulated by pH or  $\text{Ca}^{2+}$ , such as ADF/cofilin or villin, would be good candidates for  
612 a target of the hormone and mutants could be evaluated for growth in the presence of  
613 IAA or a lack of actin reorganization in response to 20–30 min IAA treatments. The  
614 drastic auxin-induced actin reorganization could require more than one actin binding  
615 protein; perhaps ecotype-specific differences in actin binding protein expression explain  
616 Col-0 and WS's dissimilar responses to NAA at 20–30 min.

## 617 **The Actin–Auxin Connection and Cell Expansion**

618 The mechanisms by which auxin and actin control growth are unknown. Actin could  
619 function by providing tracks for trafficking auxin transporters, altering vacuole  
620 morphology, and/or operating through another mechanism. Auxin efflux carriers (PIN  
621 proteins) and the influx protein AUX1 were previously shown to depend on actin for  
622 targeted subcellular localization (Kleine-Vehn et al., 2006; 2008). However, AUX1 is not

623 redistributed in response to NAA (Kleine-Vehn, et al., 2006), to which we observe at  
624 least some actin reorganization in Col-0, WS, and both *aux1* mutants. Further, use of a  
625 photoconvertible PIN2 shows that it is not maintained at the root epidermal cell plasma  
626 membrane after auxin treatments, and that most PIN2 in brefeldin A compartments is  
627 newly synthesized rather than recycled (Jasik et al., 2016). These results complicate a  
628 role for actin in trafficking auxin transporters in response to auxin; however, actin  
629 reorganization could provide tracks to transport signaling elements into the nucleus.

630 Turgor pressure exerted by the vacuole (and a loosened cell wall) is a primary  
631 driver of cell expansion (Cosgrove, 2005; Kroeger et al., 2011; Braidwood et al., 2013;  
632 Guerriero et al., 2014). Six-hour NAA treatments cause actin-dependent vacuole  
633 constriction that ultimately leads to reduced cell lengths (Scheuring et al., 2016). If the  
634 same mechanism impels growth cessation within minutes, the denser, more longitudinal  
635 actin array we detected might effect vacuole constriction.

636 Auxin-induced actin reorganization could operate primarily in signaling, and be  
637 incidental to changes in growth rate rather than driving growth per se. Whereas wildtype  
638 (Col-0) roots ceased elongating within 30 s of low-dose IAA treatments, IAA did not  
639 significantly affect *aux1-100* root elongation, and 100 nM NAA reduced root growth rate  
640 to approximately wildtype levels (Fendrych et al., 2018). At a similar timepoint after  
641 100 nM NAA treatments, we observed that both *aux1-100* and *aux1-22*, exhibited only  
642 partial, and divergent, actin reorganization. If there were direct, causative relationships  
643 between actin organization and cell expansion or vice versa, NAA should have induced  
644 in *aux1* the complete complement of actin rearrangements observed in wildtype cells or  
645 at least the same actin response in both mutant alleles.

646           Actin reorganization is highly energy intensive, costing as much as 1200 ATP-  
647 loaded actin monomers per second during filament elongation (Li et al., 2015b), and  
648 even if there is no causal relationship between auxin-induced increased actin density  
649 and parallel longitudinality, and cell expansion, it seems unlikely that such extensive  
650 reorganization would occur for no functional purpose. It is possible that initial actin  
651 reorganization after auxin treatment occurs primarily to transduce the auxin signal.  
652 Alternatively, cytoplasmic streaming and vesicle delivery could require an exact  
653 equilibrium of available tracks and space in which to move, and any actin array that  
654 disrupts that balance quickly alters cell expansion. Toward this idea, Tominaga et al.  
655 (2013) showed that faster myosins (i.e., faster delivery along actin tracks) grow larger  
656 plants with larger cells, and presumably enhanced cell expansion.

657           Our IAA treatments provide clear evidence that the actin cytoskeleton in cells  
658 along the entire root elongation zone responds to the growth cessation signal within  
659 minutes by significantly *increasing* filament abundance as well as, in opposition to the  
660 current view that organization leads to or is necessary for expansion, apparent actin  
661 organization. We show that IAA-induced actin rearrangements require AUX1, while our  
662 NAA results show that auxin itself is able to act as a cytoplasmic signal to modulate  
663 actin cytoskeleton organization. We conclude that, however auxin is acting, the  
664 relationship between actin organization and cell expansion cannot be explained by a  
665 simple model requiring either “organized” or “disorganized” actin, or by a presence or  
666 absence of longitudinal bundles.

667

## 668 **METHODS**

### 669 **Plant Material and Growth Conditions**

670 Roots for all experiments were from 6-day-old, light-grown seedlings expressing  
671 GFP-fABD2: Col-0, WS, *aux1-100*, and *aux1-22*. Seeds were surface sterilized and  
672 stratified at 4°C for two days. All plants were grown on 0.5× Murashige and Skoog  
673 medium solidified with 0.6% (w/v) agar and no sucrose, as described previously  
674 (Sheahan et al., 2004; Dyachok et al., 2011; Henty et al., 2011; Li et al., 2014b; Cai et  
675 al., 2014). Seedlings were grown at 21°C, vertically and under long-day conditions (16 h  
676 of light, 8 h of darkness).

677       Seeds for *Arabidopsis thaliana* T-DNA insertion mutant *aux1-100* (CS2360) and  
678 EMS point mutant *aux1-22* (CS9585) were obtained from the ABRC stock center and,  
679 with WS-0 and Col-0, transformed with GFP-fABD2 (Sheahan et al., 2004) using the  
680 floral dip method (Zhang et al., 2006). T1 plants were screened on plates with  
681 hygromycin. Plants of *aux1-100* were then genotyped by PCR to confirm homozygosity  
682 using DNA primers WT-forward 5'-GCATGCTATGTGGAAACCCACAGAAG-3' and WT-  
683 reverse 5'-tacCTGACGAGCGGAGGCAGATC-3' and Feldmann/AZ primers for the  
684 mutant: forward 5'-gatgcactcgaaatcagccaatttagac-3' and reverse  
685 5'-tccttcaatcggtgcggttctgtcagttc-3'. *aux1-22* mutants were identified by their agravitropic  
686 phenotype. T2 plants were used for experiments.

687

688 **VAEM Imaging, Measuring Cell Lengths, and Quantitative Analysis of Cortical**  
689 **Actin Array Architecture**

690 To measure cell sizes and obtain a corresponding measurement of each actin  
691 parameter, we collected overlapping VAEM images (single optical sections) of cortical  
692 cytoplasm in root epidermal cells expressing GFP-fABD2. Images were collected from  
693 the root apex to the first obviously visible root hair initiations.

694 VAEM was performed using a TIRF illuminator mounted on an IX-71 microscope  
695 equipped with a 60× 1.45–numerical aperture PlanApo TIRF objective (Olympus).  
696 Illumination was from a solid-state 50-mW laser (Intelligent Imaging Innovations)  
697 attenuated to 3–5% power, depending on the day, but kept the same for a single  
698 experiment/replicate. The 488-nm laser emission was captured with an electron  
699 multiplying charge-coupled device camera (ORCA-EM C9100-12; Hamamatsu  
700 Photonics). The microscope platform was operated and images collected with Slidebook  
701 software (version 6; Intelligent Imaging Innovations). A fixed exposure and gain were  
702 selected so that individual actin filaments could be seen but higher order filament  
703 structures were not intensity-saturated.

704 Two images were collected per field of view: one to capture actin filaments in  
705 focus and one to visualize the cell side and end walls in a higher focal plane, since  
706 these are frequently clearly visible in this higher plane without staining. Each image was  
707 rotated with an image rotating macro so the longitudinal axes of the cells photographed  
708 were parallel to the horizon of the image. All micrographs were cropped and analyzed in  
709 FIJI (<https://fiji.sc/>). For the analysis, we lined up the overlapping images to recreate a  
710 full view of the root. In a color (RGB) version of the image stack file, we identified,

711 marked, numbered, and measured cells whose side and end walls were distinguishable,  
712 generally choosing cells in the middle of the root to avoid including ones that might  
713 present differences in actin architecture due to differences in the cell's angle relative to  
714 the objective. On the RGB image stack, to better distinguish cells, we frequently  
715 enhanced brightness and contrast; all cropped images used for quantifying actin  
716 architecture and orientation were taken from original 8-bit files. Actin images were  
717 cropped along the entire length of every specified cell, and numbered to correspond to  
718 the specific cell from which they were cropped. Skewness and density were analyzed  
719 according to Higaki et al. (2010b) and Henty et al. (2011); angle and parallelness were  
720 analyzed according to Ueda et al. (2010) and Cai et al. (2014). The size of crops must  
721 be consistent for all images in an experiment and frequently individual crops were  
722 smaller than the entire length of a cell; in such cases an actin measurement was  
723 obtained for each crop and the final scatter-plotted measurement for each actin  
724 parameter for an individual cell was taken as the mean of the measurements from that  
725 cell's particular set of crops. In Col-0 root characterization, we analyzed cell size and  
726 corresponding actin architecture for more than 180 cells from at least 20 roots total—all  
727 the cells with clearly distinguishable end walls. For effects of IAA on Col-0, cells up to  
728 85  $\mu\text{m}$  were counted as belonging to "Region 2", cells more than 94  $\mu\text{m}$  were  
729 categorized as "Region 3", and cells falling between 85–94  $\mu\text{m}$  were counted in both  
730 categories. To quantify actin architecture and orientation on a "per cell" basis for the  
731 *WS-aux1-100* and *Col-0-aux1-22* analyses (Figure 5 and Supplemental Figures 7, 8,  
732 and 9), we used the mean value from a single cell's set of crops as the value  
733 representing the actin measurement for that cell. For example, to fully account for all the



734 actin in a 160  $\mu\text{m}$ -long<sub>cell</sub>, 10 crops would be needed. Measurements on a per cell  
735 basis would take the mean of the density values for those 10 crops as a single density  
736 value for that cell. In determining *aux1* response to IAA and NAA, we analyzed a  
737 minimum of 125 cells (from a total of at least 9 roots) per genotype per treatment.  
738 Relationships between actin parameters and cell dimensions were analyzed in Microsoft  
739 Excel and JMP.

#### 740 **Auxin Treatments**

741 IAA was obtained from Sigma-Aldrich (I2886) and diluted to a 10 mM stock  
742 concentration in ultrapure ethanol (FisherScientific BP2818500). NAA was also from  
743 Sigma-Aldrich (N0640) and diluted to a 10 mM stock concentration in ultrapure ethanol.  
744 For experiments, each auxin was further diluted to appropriate concentrations into  
745 0.5 $\times$  MS liquid medium without sucrose; for mock solution, ultrapure ethanol was added  
746 to 0.5 $\times$  MS liquid medium without sucrose to match the highest concentration of IAA or  
747 NAA used. To ensure even IAA or NAA treatment of plants during 20–30 min  
748 treatments, whole seedlings were cut from agar plates and treated by soaking on their  
749 agar block in a 24-well plate. For the very short-term treatments used for 100-s  
750 timelapse movies, plants were treated on slides by being mounted in either mock or IAA  
751 solution. Imaging began almost immediately and both regions were imaged within  
752 7 min. For 20–30 min treatments, all imaging concluded within 30 min. Because  
753 darkness can stimulate degradation of cytoskeletal organizing proteins (Dyachok et al.,  
754 2011) and a reorientation of actin filaments in hypocotyls (Breuer et al., 2014), plants  
755 were left under grow lights (while soaking in solution during 20-min treatments) and

756 slides were prepared in the light. All IAA and NAA experiments were performed and  
757 analyzed double blind.  
758

## 759 **Individual Actin Filament Dynamics**

760 Individual actin filaments were captured with 100-s timelapse VAEM using a 150×  
761 1.45 NA UApoN TIRF objective (Olympus). To determine differences in actin filament  
762 behavior between shorter and longer cells, we documented cell size by taking  
763 snapshots of the entire cells from which the timelapse movies were captured. In  
764 general, movies of Region 2 cells were collected from Region 2 cells close to the root  
765 cap and movies of Region 3 cells were collected from Region 3 cells close to the end of  
766 the elongation zone (i.e., the first cell rootward of the first visible root hair initiation). All  
767 timelapse movies and regions of interest were analyzed in FIJI. To best display the  
768 representative filaments and their dynamics, brightness and contrast were enhanced in  
769 the final montages of Figure 2B and Figure 2C. Occasionally, minimal adjustments to  
770 brightness and contrast were made during analysis to more definitively follow some  
771 filaments or events. Filament severing frequency, maximum filament length, filament  
772 lifetime, and elongation rates were measured as described previously (Staiger et al.  
773 2009; Henty et al., 2011; Cai et al., 2014; Henty-Ridilla et al., 2014). To measure  
774 bundling, debundling, and annealing frequencies, we cropped  $\approx 15 \mu\text{m} \times 15 \mu\text{m}$  ROIs  
775 (exact size  $227.7 \mu\text{m}^2$ ). For measuring individual filament responses to IAA, we used  
776  $\approx 7 \mu\text{m} \times 7 \mu\text{m}$  ROIs (exact size  $57.8 \mu\text{m}^2$ ). To account for differences in filament  
777 density in short and long cells, bundling, unbundling, and annealing frequencies were  
778 normalized against filament numbers in each ROI. An incident of bundling was counted  
779 as an incident in which filament fluorescence intensity increased, either from an  
780 apparent “catch and zip” event (categorized as a “zippering event”; these events  
781 comprise approximately 90% of observed incidents of bundling) or, simply, a visible,

782 unambiguous increase with a minimum three-frame persistence ( $3 s \geq 10\%$  filament  
783 lifetime) in fluorescence intensity for which “catch and zip” was not specifically apparent  
784 (these were categorized as “other bundling event” and account for the remaining  $\approx 10\%$   
785 of bundling incidents). Unbundling events were counted as incidents in which a filament  
786 was visible next to a mother filament (usually “unpeeling” over several timelapse  
787 frames) and, frequently, fluorescence intensity decreased. In cases without a visible  
788 decrease in fluorescence intensity, we included only events where the filament clearly  
789 “peeled off” from the mother filament. Incidents of annealing were counted when ends of  
790 two F-actin fragments joined together for a minimum of two frames. It was not highly  
791 unusual to see this annealing behavior join three pieces of recently severed actin  
792 filament; if three distinguishable fragments joined to form an individual filament in the  
793 same frame, this was counted as two annealing events, one between each fragment.

794       When capturing timelapse movies to document individual filament changes in  
795 response to IAA within 7 min, we applied  $\approx 70 \mu\text{L}$  of either blinded solution (10 nM IAA  
796 or mock) directly to the microscope slide, then the root and coverslip, and imaged  
797 immediately, alternately imaging Region 2 or Region 3 first so the timepoints of each  
798 dataset would average out to 0-7 min from applying the treatment to the slide.

799

## 800 **Accession Numbers**

801 Sequence data from this article can be found in the Arabidopsis Information Resource  
802 database (<https://www.arabidopsis.org/>) under the following names and accession  
803 numbers: AUX1 (At2G38120).

804

805

806 **SUPPLEMENTAL MATERIALS**

807 **Supplemental Table 1.** Eigenvectors for Principal Component Analysis of Cell Size  
808 vs. Actin Parameters in Col-0.

809 **Supplemental Table 2.** Eigenvalues for Principal Component Analysis of Cell Size  
810 vs. Actin Parameters in Col-0.

811 **Supplemental Table 3.** Eigenvectors for Principal Component Analysis of Cell Size  
812 vs. Actin Parameters in WS.

813 **Supplemental Table 4.** Eigenvalues for Principal Component Analysis of Cell Size  
814 vs. Actin Parameters in WS.

815 **Supplemental Table 5.** Eigenvectors for Principal Component Analysis of Cell Size  
816 vs. Actin Parameters in *aux1-100*.

817 **Supplemental Table 6.** Eigenvalues for Principal Component Analysis of Cell Size  
818 vs. Actin Parameters in *aux1-100*.

819 **Supplemental Table 7.** Actin Architecture Measurements after IAA Treatments.

820 **Supplemental Figure 1.** Epidermal Cells in Different Root Regions Exhibit Distinct  
821 Actin Filament Arrays.

822 **Supplemental Figure 2.** Actin Filament Arrays Are Not Predictive of Cell Width.

823 **Supplemental Figure 3.** Actin Filament Arrays Are Predictive of Cell Length.

824 **Supplemental Figure 4.** Actin Arrays in Region 3 Are More Dynamic than in Region  
825 2.

826 **Supplemental Figure 5.** Short-Term IAA Treatments Induce Dose-Dependent  
827 Changes in Actin Filament Organization.

828 **Supplemental Figure 6.** Short-Term IAA Treatments Induce a Time-Dependent  
829 Increase in Actin Filament Density and Longitudinal Orientation.

830 **Supplemental Figure 7.** Actin Filament Organization Plotted with Respect to  
831 Corresponding Cell Length in WS and *aux1-100*.

832 **Supplemental Figure 8.** Actin Organization in *aux1-22* Fails to Respond to Short-  
833 Term IAA Treatments but Partially Responds to the Membrane-Permeable Auxin  
834 NAA.

835 **Supplemental Figure 9.** Actin Filament Organization Plotted with Respect to  
836 Corresponding Cell Length in Col-0 and *aux1-22*.

837 **Supplemental Figure 10.** Hypothetical model of auxin perception by AUX1  
838 upstream of actin cytoskeleton reorganization.

839

## 840 **ACKNOWLEDGEMENTS**

841 This work was supported, in part, by an award from the Office of Science at the US  
842 Department of Energy, Physical Biosciences Program, under contract number  
843 DE-FG02-09ER15526 to C.J.S.

844

## 845 **AUTHOR CONTRIBUTIONS**

846 R.S.A and C.J.S conceived the project and designed the experiments; R.S.A performed  
847 the experiments and data analysis; and R.S.A and C.J.S. wrote the article.

848 **REFERENCES**

- 849 **Andrianantoandro, E., Blanchoin, L., Sept, D., McCammon, J.A., and Pollard, T.D.**  
850 (2001). Kinetic mechanism of end-to-end annealing of actin filaments. *J. Mol.*  
851 *Biol.* **312**: 721-730. doi:10.1006/jmbi.2001.5005.
- 852 **Baluška, F., Jasik, J., Edelman, H.G., Salajová, T., and Volkmann, D.** (2001).  
853 Latrunculin B-induced plant dwarfism: plant cell elongation is F-actin-dependent.  
854 *Dev. Biol.* **231**: 113-124. doi:10.1006/dbio.2000.0115.
- 855 **Baluška, F., and Mancuso, S.** (2013). Root apex transition zone as oscillatory zone.  
856 *Front. Plant Sci.* **4**: e354. doi:10.3389/fpls.2013.00354.
- 857 **Baluška, F., Vitha, S., Barlow, P.W., and Volkmann, D.** (1997). Rearrangements of F-  
858 actin arrays in growing cells of intact maize root apex tissues: a major  
859 developmental switch occurs in the postmitotic transition region. *Eur. J. Cell Biol.*  
860 **72**: 113-121.
- 861 **Band, L.R., Wells, D.M., Larrieu, A., Sun, J., Middleton, A.M., French, A.P.,**  
862 **Brunoud, G., Sato, E.M., Wilson, M.H., Péret, B., Oliva, M., Swarup, R.,**  
863 **Sairanen, I., Parry, G., Ljung, K., Beeckman, T., Garibaldi, J.M., Estelle, M.,**  
864 **Owen, M.R., Vissenberg, K., Hodgman, T.C., Pridmore, T.P., King, J.R.,**  
865 **Vernoux, T., and Bennett, M.J.** (2012). Root gravitropism is regulated by a  
866 transient lateral auxin gradient controlled by a tipping-point mechanism. *Proc.*  
867 *Natl. Acad. Sci. USA* **109**: 4668-4673. doi:10.1073/pnas.1201498109.
- 868 **Beemster, G.T.S., and Baskin, T.I.** (1998). Analysis of cell division and elongation  
869 underlying the developmental acceleration of root growth in *Arabidopsis thaliana*.  
870 *Plant Physiol.* **116**: 1515-1526. doi:10.1104/pp.116.4.1515.



- 871 **Beemster, G.T.S., and Baskin, T.I.** (2000). *STUNTED PLANT 1* mediates effects of  
872 cytokinin, but not of auxin, on cell division and expansion in the root of  
873 *Arabidopsis*. *Plant Physiol.* **124**: 1718–1727. doi:10.1104/pp.124.4.1718.
- 874 **Bennett, M.J., Marchant, A., Green, H.G., May, S.T., Ward, S.P., Millner, P.A.,**  
875 **Walker, A.R., Schulz, B., and Feldmann, K.A.** (1996). *Arabidopsis AUX1* gene:  
876 a permease-like regulator of root gravitropism. *Science* **273**: 948-950.  
877 doi:10.1126/science.273.5277.948.
- 878 **Braidwood, L., Breuer, C., and Sugimoto, K.** (2014). My body is a cage: Mechanisms  
879 and modulation of plant cell growth. *New Phytol.* **201**: 388-402.  
880 doi:10.1111/nph.12473.
- 881 **Breuer, D., Ivakov, A., Sampathkumar, A., Hollandt, F., Persson, S., and Nikoloski,**  
882 **Z.** (2014). Quantitative analyses of the plant cytoskeleton reveal underlying  
883 organizational principles. *J. Royal Soc. Interface* **11**: e20140362.  
884 doi:10.1098/rsif.2014.0362.
- 885 **Brunoud, G., Wells, D. M., Oliva, M., Larrieu, A., Mirabet, V., Burrow, A. H.,**  
886 **Beeckman, T., Kepinski, S., Traas, J., Bennett, M.J., Vernoux, T.** (2012). A  
887 novel sensor to map auxin response and distribution at high spatio-temporal  
888 resolution. *Nature* **482**: 103-106. doi:10.1038/nature10791.
- 889 **Cai, C., Henty-Ridilla, J.L., Szymanski, D.B., and Staiger, C.J.** (2014). *Arabidopsis*  
890 myosin XI: A motor rules the tracks. *Plant Physiol.* **166**: 1359-1370.  
891 doi:10.1104/pp.114.244335.
- 892 **Calderón Villalobos, L.I.A., Lee, S., De Oliveira, C., Ivetac, A., Brandt, W.,**  
893 **Armitage, L., Sheard, L. B., Tan, X., Parry, G., Mao, H., Zheng, N., Napier, R.,**

- 894           **Kepinski, S., and Estelle, M.** (2012). A combinatorial TIR1/AFB-Aux/IAA co-  
895           receptor system for differential sensing of auxin. *Nat. Chem. Biol* **8**: 477-485.  
896           doi:10.1038/nchembio.926.
- 897           **Cao, L., Henty-Ridilla, J.L., Blanchoin, L., and Staiger, C.J.** (2016). Profilin-  
898           dependent nucleation and assembly of actin filaments controls cell elongation in  
899           Arabidopsis. *Plant Physiol.* **170**: 220-233. doi:10.1104/pp.15.01321.
- 900           **Cárdenas, L., Vidali, L., Domínguez, J., Pérez, H., Sánchez, F., Hepler, P.K., and**  
901           **Quinto, C.** (1998). Rearrangement of actin microfilaments in plant root hairs  
902           responding to rhizobium ETLI nodulation signals. *Plant Physiol.* **116**: 871-877.  
903           doi:10.1104/pp.116.3.871.
- 904           **Carrier, D.J., Bakar, N.T.A., Swarup, R., Callaghan, R., Napier, R.M., Bennett, M.J.,**  
905           **and Kerr, I.D.** (2008). The binding of auxin to the Arabidopsis auxin influx  
906           transporter AUX1. *Plant Physiol.* **148**: 529-535. doi:10.1104/pp.108.122044.
- 907           **Chen, J.-G, Ullah, H., Young, J. C., Sussman, M.R., and Jones, A.M.** (2001). ABP1  
908           is required for organized cell elongation and division in *Arabidopsis*  
909           embryogenesis. *Genes Dev.* **15**: 902-911. doi:10.1101/gad.866201.
- 910           **Chen, X., Naramoto, S., Robert, S., Tejos, R., Löffke, C., Lin, D., Yang, Z., and Friml,**  
911           **J.** (2012). ABP1 and ROP6 GTPase signaling regulate clathrin-mediated  
912           endocytosis in *Arabidopsis* roots. *Curr. Biol.* **22**: 1326-1332.  
913           doi:10.1016/j.cub.2012.05.020.
- 914           **Cosgrove, D.J.** (2005). Growth of the plant cell wall. *Nat. Rev. Mol. Cell Biol.* **6**: 850-  
915           861. doi:10.1038/nrm1746.

- 916 **Dai, X., Zhang, Y., Zhang, D., Chen, J., Gao, X., Estelle, M., and Zhao, Y. (2015).**  
917 Embryonic lethality of *Arabidopsis abp1-1* is caused by deletion of the adjacent  
918 BSM gene. *Nat. Plants* **1**: e15183. doi:10.1038/nplants.2015.183.
- 919 **Delker, C., Pöschl, Y., Raschke, A., Ullrich, K., Ettingshausen, S., Hauptmann, V.,**  
920 **Grosse, I., and Quint, M. (2010).** Natural variation of transcriptional auxin  
921 response networks in *Arabidopsis thaliana*. *Plant Cell* **22**: 2184-2200.  
922 doi:10.1105/tpc.110.073957.
- 923 **Dharmasiri, N., Dharmasiri, S., and Estelle, M. (2005a).** The F-box protein TIR1 is an  
924 auxin receptor. *Nature* **435**: 441-445. doi:10.1038/nature03543.
- 925 **Dharmasiri, N., Dharmasiri, S., Weijers, D., Lechner, E., Yamada, M., Hobbie, L.,**  
926 **Ehrismann, J.S., Jürgens, G., and Estelle, M. (2005b).** Plant development is  
927 regulated by a family of auxin receptor F-box proteins. *Dev. Cell* **9**: 109-119.  
928 doi:10.1016/j.devcel.2005.05.014.
- 929 **Dhonukshe, P., Grigoriev, I., Fischer, R., Tominaga, M., Robinson, D. G., Hašek, J.,**  
930 **Paciorek, T., Petrášek, J., Seifertová, D., Tejos, R., Meisel, L.A., Zažímalová,**  
931 **E., Gadella, Jr., T.W.J., Steirhof, Y.-D., Ueda, T., Oiwa, K., Akhmanova, A.,**  
932 **Brock, R., Spang, A., and Friml, J. (2008).** Auxin transport inhibitors impair  
933 vesicle motility and actin cytoskeleton dynamics in diverse eukaryotes. *Proc.*  
934 *Natl. Acad. Sci. USA* **105**: 4489-4494. doi:10.1073/pnas.0711414105.
- 935 **Dindas, J., Scherzer, S., Roelfsema, M.R.G., Von Meyer, K., Müller, H.M., Al-**  
936 **Rasheid, K.A.S., Palme, K., Dietrich, P., Becker, D., Bennett, M.J., and**  
937 **Hedrich, R. (2018).** AUX1-mediated root hair auxin influx governs

- 938 SCFTIR1/AFB-type  $\text{Ca}^{2+}$  signaling. Nat. Commun. **9**: e1174.  
939 doi:10.1038/s41467-018-03582-5.
- 940 **Dyachok, J., Zhu, L., Liao, F., He, J., Huq, E., and Blancaflor, E.B.** (2011). SCAR  
941 mediates light-induced root elongation in *Arabidopsis* through photoreceptors  
942 and proteasomes. Plant Cell **23**: 3610-3626. doi:10.1105/tpc.111.088823.
- 943 **Falasca, G., and Altamura, M.M.** (2003). Histological analysis of adventitious rooting in  
944 *Arabidopsis thaliana* (L.) Heynh seedlings. Plant Biosyst. **137**: 265-273.  
945 dx.doi.org/10.1080/11263500312331351511.
- 946 **Feldmann, K.A.** (1991). T-DNA insertion mutagenesis in *Arabidopsis*: Mutational  
947 spectrum. Plant J. **1**: 71–82. doi:10.1111/j.1365-313X.1991.00071.x.
- 948 **Fendrych, M., Akhmanova, M., Merrin, J., Glanc, M., Hagihara, S., Takahashi, K.,**  
949 **Uchida, N., Torii, K.U., and Friml, J.** (2018). Rapid and reversible root growth  
950 inhibition by TIR1 auxin signalling. Nat. Plants **4**: 453-459. doi:10.1038/s41477-  
951 018-0190-1.
- 952 **Gao, Y., Zhang, Y., Zhang, D., Dai, X., Estelle, M., and Zhao, Y.** (2015). AUXIN  
953 BINDING PROTEIN 1 (ABP1) is not required for either auxin signaling or  
954 *Arabidopsis* development. Proc. Natl. Acad. Sci. USA **112**: 2275-2280.  
955 doi:10.1073/pnas.1500365112.
- 956 **Gilliland, L.U., Pawloski, L.C., Kandasamy, M.K., and Meagher, R.B.** (2003).  
957 *Arabidopsis* actin gene *ACT7* plays an essential role in germination and root  
958 growth. Plant J. **33**: 319-328. doi:10.1046/j.1365-313X.2003.01626.x.
- 959 **Grones, P. and Friml, J.** (2015). Auxin transporters and binding proteins at a glance. J.  
960 Cell Sci. **128**: 1-7. doi:10.1242/jcs.159418.

- 961 **Guerriero, G., Hausman, J. -F, and Cai, G.** (2014). No stress! Relax! Mechanisms  
962 governing growth and shape in plant cells. *Int. J. Mol. Sci.* **15**: 5094-5114.  
963 doi:10.3390/ijms15035094.
- 964 **Hacham, Y., Holland, N., Butterfield, C., Ubeda-Tomas, S., Bennett, M.J., Chory, J.,**  
965 **and Savaldi-Goldstein, S.** (2011). Brassinosteroid perception in the epidermis  
966 controls root meristem size. *Development* **138**: 839-848.  
967 doi:10.1242/dev.061804.
- 968 **Hayashi, K.-I, Nakamura, S., Fukunaga, S., Nishimura, T., Jenness, M.K., Murphy,**  
969 **A.S., Motose, H., Nozaki, H., Furutani, M., and Aoyama, T.** (2014). Auxin  
970 transport sites are visualized in planta using fluorescent auxin analogs. *Proc.*  
971 *Natl. Acad. Sci. USA* **111**: 11557-11562. doi:10.1073/pnas.1408960111.
- 972 **Hejnowicz, Z., and Erickson, R.O.** (1968). Growth inhibition and recovery in roots  
973 following temporary treatment with auxin. *Physiol. Plantarum* **21**: 302-313.  
974 doi:10.1111/j.1399-3054.1968.tb07254.x.
- 975 **Henty, J.L., Bledsoe, S.W., Khurana, P., Meagher, R.B., Day, B., Blanchoin, L., and**  
976 **Staiger, C.J.** (2011). *Arabidopsis* ACTIN DEPOLYMERIZING FACTOR4  
977 modulates the stochastic dynamic behavior of actin filaments in the cortical array  
978 of epidermal cells. *Plant Cell* **23**: 3711-3726. doi:10.1105/tpc.111.090670.
- 979 **Henty-Ridilla, J.L., Li, J., Blanchoin, L., and Staiger, C.J.** (2013). Actin dynamics in  
980 the cortical array of plant cells. *Curr. Opin. Plant Biol.* **16**: 678-687.  
981 doi:10.1016/j.pbi.2013.10.012.

- 982 **Henty-Ridilla, J.L., Li, J., Day, B., and Staiger, C.J.** (2014). ACTIN  
983 DEPOLYMERIZING FACTOR4 Regulates actin dynamics during innate immune  
984 signaling in *Arabidopsis*. *Plant Cell* **26**: 340-352. doi:10.1105/tpc.113.122499.
- 985 **Higaki, T., Kojo, K.H., and Hasezawa, S.** (2010a.) Critical role of actin bundling in  
986 plant cell morphogenesis. *Plant Signal. Behav.* **5**: 484-488.  
987 doi:10.4161/psb.10947.
- 988 **Higaki, T., Kurusu, T., Hasezawa, S., and Kuchitsu, K.** (2011). Dynamic intracellular  
989 reorganization of cytoskeletons and the vacuole in defense responses and  
990 hypersensitive cell death in plants. *J. Plant Res.* **124**: 315-324.  
991 doi:10.1007/s10265-011-0408-z.
- 992 **Higaki, T., Kutsuna, N., Sano, T., Kondo, N., and Hasezawa, S.** (2010b.)  
993 Quantification and cluster analysis of actin cytoskeletal structures in plant cells:  
994 role of actin bundling in stomatal movement during diurnal cycles in *Arabidopsis*  
995 guard cells. *Plant J.* **61**: 156-165. doi:10.1111/j.1365-313X.2009.04032.x.
- 996 **Holweg, C., Süßlin, C., and Nick, P.** (2004). Capturing in vivo dynamics of the actin  
997 cytoskeleton stimulated by auxin or light. *Plant Cell. Physiol.* **45**: 855-863.  
998 doi:10.1093/pcp/pch102.
- 999 **Hussey, P.J., Ketelaar, T., and Deeks, M.J.** (2006). Control of the actin cytoskeleton in  
1000 plant cell growth. *Annu. Rev. Plant Biol.* **57**: 109-125.  
1001 doi:10.1146/annurev.arplant.57.032905.105206.
- 1002 **Jásik, J., Bokor, B., Stuchlík, S., Mičieta, K., Turňa, J., and Schmelzer, E.** (2016).  
1003 Effects of auxins on PIN-FORMED2 (PIN2) dynamics are not mediated by

- 1004 inhibiting PIN2 endocytosis. *Plant Physiol.* **172**: 1019-1031.  
1005 doi:10.1104/pp.16.00563.
- 1006 **Kandasamy, M.K., McKinney, E.C., and Meagher, R.B.** (2009). A single vegetative  
1007 actin isovariant overexpressed under the control of multiple regulatory sequences  
1008 is sufficient for normal *Arabidopsis* development. *Plant Cell* **21**: 701-718.  
1009 doi:10.1105/tpc.108.061960.
- 1010 **Kepinski, S. and Leyser, O.** (2005). The *Arabidopsis* F-box protein TIR1 is an auxin  
1011 receptor. *Nature* **435**: 446-451. doi:10.1038/nature03542.
- 1012 **Ketelaar, T., De Ruijter, N.C.A., and Emons, A.M.C.** (2003). Unstable F-actin  
1013 specifies the area and microtubule direction of cell expansion in *Arabidopsis* root  
1014 hairs. *Plant Cell* **15**: 285-292. doi:10.1105/tpc.007039.
- 1015 **Kleine-Vehn, J., Dhonukshe, P., Sauer, M., Brewer, P.B., Wiśniewska, J., Paciorek,**  
1016 **T., Benková, E., and Friml, J.** (2008). ARF GEF-dependent transcytosis and  
1017 polar delivery of PIN auxin carriers in *Arabidopsis*. *Curr. Biol.* **18**: 526-531.  
1018 doi:10.1016/j.cub.2008.03.021.
- 1019 **Kleine-Vehn, J., Dhonukshe, P., Swarup, R., Bennett, M., and Friml, J.** (2006).  
1020 Subcellular trafficking of the *Arabidopsis* auxin influx carrier AUX1 uses a novel  
1021 pathway distinct from PIN1. *Plant Cell* **18**: 3171-3181.  
1022 doi:10.1105/tpc.106.042770.
- 1023 **Kleine-Vehn, J. and Friml, J.** (2008). Polar targeting and endocytic recycling in auxin-  
1024 dependent plant development. *Annu. Rev. Cell Dev. Biol.* **24**: 447-473.  
1025 doi:10.1146/annurev.cellbio.24.110707.175254.

- 1026 **Kroeger, J.H., Zerzour, R., and Geitmann, A.** (2011). Regulator or driving force? The  
1027 role of turgor pressure in oscillatory plant cell growth. *PLoS ONE* **6**: e18549.  
1028 doi:10.1371/journal.pone.0018549.
- 1029 **Leucci, M.R., Di Sansebastiano, G. -P, Gigante, M., Dalessandro, G., and Piro, G.**  
1030 (2007). Secretion marker proteins and cell-wall polysaccharides move through  
1031 different secretory pathways. *Planta* **225**: 1001-1017. doi:10.1007/s00425-006-  
1032 0407-9.
- 1033 **Li, G., Liang, W., Zhang, X., Ren, H., Hu, J., Bennett, M.J., and Zhang, D.** (2014a).  
1034 Rice actin-binding protein RMD is a key link in the auxin-actin regulatory loop that  
1035 controls cell growth. *Proc. Natl. Acad. Sci. USA* **111**: 10377-10382.  
1036 doi:10.1073/pnas.1401680111.
- 1037 **Li, J., Arieti, R., and Staiger, C.J.** (2015a). "Actin filament dynamics and their role in  
1038 plant cell expansion." pp. 127-162 in *Plant Cell Wall Patterning and Cell Shape*,  
1039 H. Fukuda, ed. doi:10.1002/9781118647363.ch5.
- 1040 **Li, J., Henty-Ridilla, J.L., Huang, S., Wang, X., Blanchoin, L., and Staiger, C.J.**  
1041 (2012). Capping protein modulates the dynamic behavior of actin filaments in  
1042 response to phosphatidic acid in *Arabidopsis*. *Plant Cell* **24**: 3742-3754.  
1043 doi:10.1105/tpc.112.103945.
- 1044 **Li, J., Henty-Ridilla, J.L., Staiger, B.H., Day, B., and Staiger, C.J.** (2015b). Capping  
1045 protein integrates multiple MAMP signalling pathways to modulate actin  
1046 dynamics during plant innate immunity. *Nat. Commun.* **6**: 7206.  
1047 doi:10.1038/ncomms8206.



- 1048 **Li, J., Staiger, B.H., Henty-Ridilla, J.L., Abu-Abied, M., Sadot, E., Blanchoin, L.,**  
1049 **and Staiger, C.J.** (2014b). The availability of filament ends modulates actin  
1050 stochastic dynamics in live plant cells. *Mol. Biol. Cell* **25**: 1263-1275.  
1051 doi:10.1091/mbc.E13-07-0378.
- 1052 **Lin, D., Nagawa, S., Chen, J., Cao, L., Chen, X., Xu, T., Li, H., Dhonukshe, P.,**  
1053 **Yamamuro, C., Friml, J., Scheres, B., Fu, Y., Yang, Z.** (2012). A ROP GTPase-  
1054 dependent auxin signaling pathway regulates the subcellular distribution of PIN2  
1055 in *Arabidopsis* roots. *Curr. Biol.* **22**: 1319-1325. doi:10.1016/j.cub.2012.05.019.
- 1056 **Maher, E.P., and Martindale, S.J.B.** (1980). Mutants of *Arabidopsis thaliana* with  
1057 altered responses to auxins and gravity. *Biochem. Genet.* **18**: 1041-1053.  
1058 doi:10.1007/BF00484337.
- 1059 **Marchant, A., Kargul, J., May, S.T., Muller, P., Delbarre, A., Perrot-Rechenmann,**  
1060 **C., and Bennett, M.J.** (1999). AUX1 regulates root gravitropism in *Arabidopsis*  
1061 by facilitating auxin uptake within root apical tissues. *EMBO J.* **18**: 2066-2073.  
1062 doi:10.1093/emboj/18.8.2066.
- 1063 **Mathur, J.** (2004). Cell shape development in plants. *Trends Plant Sci.* **9**: 583-590.  
1064 doi:10.1016/j.tplants.2004.10.006.
- 1065 **Monshausen, G.B., Miller, N.D., Murphy, A.S., and Gilroy, S.** (2011). Dynamics of  
1066 auxin-dependent Ca<sup>2+</sup> and pH signaling in root growth revealed by integrating  
1067 high-resolution imaging with automated computer vision-based analysis. *Plant J.*  
1068 **65**: 309-318. doi:10.1111/j.1365-313X.2010.04423.x.
- 1069 **Nagawa, S., Xu, T., Lin, D., Dhonukshe, P., Zhang, X., Friml, J., Scheres, B., Fu, Y.,**  
1070 **and Yang, Z.** (2012). ROP GTPase-dependent actin microfilaments promote

- 1071 PIN1 polarization by localized inhibition of clathrin-dependent endocytosis. PLoS  
1072 Biol. **10**: e1001299. doi:10.1371/journal.pbio.1001299.
- 1073 **Nick, P.** (2010). Probing the actin-auxin oscillator. Plant Signal. Behav. **5**: 94-98.  
1074 doi:10.4161/psb.5.2.10337.
- 1075 **Nick, P., Han, M.-J, and An, G.** (2009). Auxin stimulates its own transport by shaping  
1076 actin filaments. Plant Physiol. **151**: 155-167. doi:10.1104/pp.109.140111.
- 1077 **Overvoorde, P., Fukaki, H., and Beeckman, T.** (2010). Auxin control of root  
1078 development. CSH Perspect. Biol. **2**: a001537.  
1079 doi:10.1101/cshperspect.a001537.
- 1080 **Pickett, F.B., Wilson, A.K., and Estelle, M.** (1990). The *aux1* mutation of *Arabidopsis*  
1081 confers both auxin and ethylene resistance. Plant Physiol. **94**: 1462-1466.  
1082 doi:10.1104/pp.94.3.1462.
- 1083 **Rahman, A., Bannigan, A., Sulaman, W., Pechter, P., Blancaflor, E.B., and Baskin,**  
1084 **T.I.** (2007). Auxin, actin and growth of the *Arabidopsis thaliana* primary root.  
1085 Plant J. **50**: 514-528. doi:10.1111/j.1365-313X.2007.03068.x.
- 1086 **Rashotte, A.M., Poupart, J., Waddell, C.S., and Muday, G.K.** (2003). Transport of the  
1087 two natural auxins, indole-3-butyric acid and indole-3-acetic acid, in *Arabidopsis*.  
1088 Plant Physiol. **133**: 761-772. doi:10.1104/pp.103.022582.
- 1089 **Roman G, Lubarsky, B., Kieber, J.J., Rothenberg, M., and Ecker, J.R.** (1995).  
1090 Genetic analysis of ethylene signal transduction in *Arabidopsis thaliana*: Five  
1091 novel mutant loci integrated into a stress response pathway. Genetics **139**:  
1092 1393–1409.

- 1093 **Rutschow, H.L., Baskin, T.I., and Kramer, E.M.** (2014). The carrier AUXIN  
1094 RESISTANT (AUX1) dominates auxin flux into Arabidopsis protoplasts. New  
1095 Phytol. **204**: 536-544. doi:10.1111/nph.12933.
- 1096 **Sauer, M., and Kleine-Vehn, J.** (2011). AUXIN BINDING PROTEIN1: The outsider.  
1097 Plant Cell **23**: 2033-2043. doi:10.1105/tpc.111.087064.
- 1098 **Savaldi-Goldstein, S., Peto, C., and Chory, J.** (2007). The epidermis both drives and  
1099 restricts plant shoot growth. Nature **446**: 199-202. doi:10.1038/nature05618.
- 1100 **Scheuring, D., Löffke, C., Krüger, F., Kittelmann, M., Eisa, A., Hughes, L., Smith,  
1101 R.S., Hawes, C., Schumacher, K., and Kleine-Vehn, J.** (2016). Actin-  
1102 dependent vacuolar occupancy of the cell determines auxin-induced growth  
1103 repression. Proc. Natl. Acad. Sci. USA **113**: 452-457.  
1104 doi:10.1073/pnas.1517445113.
- 1105 **Schultz, E.R., Zupanska, A.K., Sng, N.J., Paoul, A-L., and Ferl, R.J.** (2017). Skewing  
1106 in Arabidopsis roots involves disparate environmental signaling pathways. BMC  
1107 Plant Biol. **17**: 31. doi:10.1186/s12870-017-0975-9.
- 1108 **Sheahan, M.B., Staiger, C.J., Rose, R.J., and McCurdy, D.W.** (2004). A green  
1109 fluorescent protein fusion to actin-binding domain 2 of Arabidopsis fimbrin  
1110 highlights new features of a dynamic actin cytoskeleton in live plant cells. Plant  
1111 Physiol. **136**: 3968-3978. doi:10.1104/pp.104.049411.
- 1112 **Smertenko, A.P., Deeks, M.J., and Hussey, P.J.** (2010). Strategies of actin  
1113 reorganisation in plant cells. J. Cell Sci. **123**: 3019-3028. doi:10.1242/jcs.071126.
- 1114 **Staiger, C.J., Sheahan, M.B., Khurana, P., Wang, X., McCurdy, D.W., and  
1115 Blanchoin, L.** (2009). Actin filament dynamics are dominated by rapid growth

- 1116 and severing activity in the *Arabidopsis* cortical array. *J. Cell Biol.* **184**: 269-280.  
1117 doi:10.1083/jcb.200806185.
- 1118 **Swarup, R., Kargul, J., Marchant, A., Zadik, D., Rahman, A., Mills, R., Yemm, A.,**  
1119 **May, S., Williams, L., Millner, P., Tsurumi, S., Moore, I., Napier, R., Kerr, I.D.,**  
1120 **Bennett, M.J.** (2004). Structure-function analysis of the presumptive *Arabidopsis*  
1121 auxin permease AUX1. *Plant Cell* **16**: 3069-3083. doi:10.1105/tpc.104.024737.
- 1122 **Swarup, R., and Péret, B.** (2012). AUX/LAX Family of auxin influx carriers-an overview.  
1123 *Front. Plant Sci.* **3**: e225. doi:10.3389/fpls.2012.00225.
- 1124 **Szymanski, D.B., and Cosgrove, D.J.** (2009). Dynamic coordination of cytoskeletal  
1125 and cell wall systems during plant cell morphogenesis. *Curr. Biol.* **19**: R800-  
1126 R811. doi:10.1016/j.cub.2009.07.056.
- 1127 **Szymanski, D., and Staiger, C.J.** (2017). The actin cytoskeleton: functional arrays for  
1128 cytoplasmic organization and cell shape control. *Plant Physiol.* **176**: 106-118.  
1129 doi:<https://doi.org/10.1104/pp.17.01519>.
- 1130 **Thomas, C.** (2012). Bundling Actin filaments from membranes: Some novel players.  
1131 *Front. Plant Sci.* **3**: e188. doi:10.3389/fpls.2012.00188.
- 1132 **Tominaga, M., Kimura, A., Yokota, E., Haraguchi, T., Shimmen, T., Yamamoto, K.,**  
1133 **Nakano, A., and Ito, K.** (2013). Cytoplasmic streaming velocity as a plant size  
1134 determinant. *Dev. Cell* **27**: 345-352. doi:10.1016/j.devcel.2013.10.005.
- 1135 **Ueda, H., Yokota, E., Kutsuna, N., Shimada, T., Tamura, K., Shimmen, T.,**  
1136 **Hasezawa, S., Dolja, V. V., and Hara-Nishimuraa, I.** (2010). Myosin-dependent  
1137 endoplasmic reticulum motility and F-actin organization in plant cells. *Proc. Natl.*  
1138 *Acad. Sci. USA* **107**: 6894-6899. doi:10.1073/pnas.0911482107.

- 1139 **Ugartechea-Chirino, Y., Swarup, R., Swarup, K., Péret, B., Whitworth, M., Bennett,**  
1140 **M., and Bougourd, S.** (2010). The AUX1 LAX family of auxin influx carriers is  
1141 required for the establishment of embryonic root cell organization in *Arabidopsis*  
1142 *thaliana*. *Ann. Bot.* **105**: 277–289. doi:10.1093/aob/mcp287.
- 1143 **Ulmasov, T., Hagen, G., and Guilfoyle, T.J.** (1999). Activation and repression of  
1144 transcription by auxin-response factors. *Proc. Natl. Acad. Sci. USA* **96**: 5844-  
1145 5849. doi:10.1073/pnas.96.10.5844.
- 1146 **van der Weele, C.M., Jiang, H.S., Palaniappan, K.K., Ivanov, V.B., Palaniappan, K.,**  
1147 **and Baskin, T.I.** (2003). A new algorithm for computational image analysis of  
1148 deformable motion at high spatial and temporal resolution applied to root growth.  
1149 roughly uniform elongation in the meristem and also, after an abrupt acceleration,  
1150 in the elongation zone. *Plant Physiol.* **132**: 1138-1148.  
1151 doi:10.1104/pp.103.021345.
- 1152 **Vidali, L., Burkart, G.M., Augustine, R.C., Kerdavid, E., Tüzel, E., and Bezanilla, M.**  
1153 (2010). Myosin XI is essential for tip growth in *Physcomitrella patens*. *Plant Cell*  
1154 **22**: 1868-1882. doi:10.1105/tpc.109.073288.
- 1155 **Wu, S., Xie, Y., Zhang, J., Ren, Y., Zhang, X., Wang, J., Guo, X., Wu, F., Sheng, P.,**  
1156 **Wang, J., Wu, C., Wang, H., Huang, S., and Wan, J.** (2015). VLN2 regulates  
1157 plant architecture by affecting microfilament dynamics and polar auxin transport  
1158 in rice. *Plant Cell* **27**: 2829-2845. doi:10.1105/tpc.15.00581.
- 1159 **Xu, T., Dai, N., Chen, J., Nagawa, S., Cao, M., Li, H., Zhou, Z., Chen, X., De Rycke,**  
1160 **R., Rakusová, H., Wang, W., Jones, A.M., Friml, J., Patterson, S.E.,**  
1161 **Bleecker, A.B., Yang, Z.** (2014). Cell surface ABP1-TMK auxin-sensing complex

- 1162            activates    ROP    GTPase    signaling.    Science    **343**:    1025-1028.  
1163            doi:10.1126/science.1245125.
- 1164    **Xu, T., Nagawa, S., and Yang, Z.** (2011). Uniform auxin triggers the Rho GTPase-  
1165            dependent formation of interdigitation patterns in pavement cells. *Small GTPases*  
1166            **2**: 227-232. doi:10.4161/sgtp.2.4.16702.
- 1167    **Xu, T., Wen, M., Nagawa, S., Fu, Y., Chen, J. -G, Wu, M. -J, Perrot-Rechenmann, C.,**  
1168            **Friml, J., Jones, A.M., and Yang, Z.** (2010). Cell surface- and Rho GTPase-  
1169            based auxin signaling controls cellular interdigitation in *Arabidopsis*. *Cell* **143**: 99-  
1170            110. doi:10.1016/j.cell.2010.09.003.
- 1171    **Yanagisawa, M., Desyatova, A.S., Belteton, S.A., Mallery, E.L., Turner, J.A., and**  
1172            **Szymanski, D.B.** (2015). Patterning mechanisms of cytoskeletal and cell wall  
1173            systems during leaf trichome morphogenesis. *Nat. Plants* **1**: e 15014.  
1174            doi:10.1038/nplants.2015.14.
- 1175    **Yang, W., Ren, S., Zhang, X., Gao, M., Ye, S., Qi, Y., Zheng, Y., Wang, J., Zeng, L.,**  
1176            **Li, Q., Huang, S., and He, Z.** (2011). BENT UPPERMOST INTERNODE1  
1177            encodes the class II formin FH5 crucial for actin organization and rice  
1178            development. *Plant Cell* **23**: 661-680. doi:10.1105/tpc.110.081802.
- 1179    **Yang, Y., Hammes, U.Z., Taylor, C. G., Schachtman, D.P., and Nielsen, E.** (2006).  
1180            High-affinity auxin transport by the AUX1 influx carrier protein. *Curr. Biol.* **16**:  
1181            1160. doi:10.1016/j.cub.2006.05.043.
- 1182    **Yoshimitsu, Y., Tanaka, K., Fukuda, W., Asami, T., Yoshida, S., Hayashi, K.-i,**  
1183            **Kamiya, Y., Jikumaru, Y., Shigeta, T., Nakamura, Y., Matsuo, T., and**  
1184            **Okamoto, S.** (2011). Transcription of *DWARF4* plays a crucial role in auxin-

- 1185 regulated root elongation in addition to brassinosteroid homeostasis in  
1186 *Arabidopsis thaliana*. PLoS ONE **6**: e23851. doi:10.1371/journal.pone.0023851.
- 1187 **Zhang, W., Cai, C., and Staiger, C.J.** (2019). Myosins XI are involved in exocytosis of  
1188 cellulose synthase complexes. Plant Physiol. **179**: 1537-1555.  
1189 doi:10.1104/pp.19.00018.
- 1190 **Zhang, X., Henriques, R., Lin, S-S., Niu, Q.W., and Chua, N-H.** (2006).  
1191 Agrobacterium-mediated transformation of *Arabidopsis thaliana* using the floral  
1192 dip method. Nature Protoc. **1**: 641–646. doi:10.1038/nprot.2006.97.
- 1193 **Zhang, Z., Zhang, Y., Tan, H., Wang, Y., Li, G., Liang, W., Yuan, Z., Hu, J., Ren, H.,  
1194 and Zhang, D.** (2011). RICE MORPHOLOGY DETERMINANT encodes the type  
1195 II formin FH5 and regulates rice morphogenesis. Plant Cell **23**: 681-700.  
1196 doi:10.1105/tpc.110.081349.
- 1197 **Zhu, J., Bailly, A., Zwiewka, M., Sovero, V., Di Donato, M., Ge, P., Oehri, J., Aryal,  
1198 B., Hao, P., Linnert, M., Burgardt, N.I., Lücke, C., Weiwad, M., Michel, M.,  
1199 Weiergräber, O.H., Pollmann, S., Azzarello, E., Mancuso, S., Ferro, N.,  
1200 Fukao, Y., Hoffmann, C., Wedlich-Söldner, R., Friml, J., Thomas, C., and  
1201 Geisler, M.** (2016). TWISTED DWARF1 mediates the action of auxin transport  
1202 inhibitors on actin cytoskeleton dynamics. Plant Cell **28**: 930-948.  
1203 doi:10.1105/tpc.15.00726.
- 1204 **Zhu, J., and Geisler, M.** (2015). Keeping it all together: Auxin-actin crosstalk in plant  
1205 development. J. Exp. Bot. **66**: 4983-4998. doi:10.1093/jxb/erv308.
- 1206

1207 **FIGURE LEGENDS**

1208 **Figure 1.** Actin Architecture is Predictive of Epidermal Cell Length in the Root  
1209 Elongation Zone.

1210 **(A)** Mosaic of root elongation zone in an Arabidopsis seedling expressing GFP-fABD2  
1211 imaged with variable angle epifluorescence microscopy (VAEM). Arrowhead, root apex;  
1212 arrow, first root hair initiation. MosaicJ was used to compile 13 original VAEM images.  
1213 Scale bar, 100  $\mu\text{m}$ .

1214 **(B)** Representative images of actin organization in two root regions. Scale bar, 10  $\mu\text{m}$ .

1215 **(C) to (G)** Quantification of actin architecture or orientation metrics plotted with respect  
1216 to corresponding epidermal cell length **(D)**, **(E)**, **(F)**, and **(G)** or cell width **(C)** in two  
1217 regions within the root elongation zone. Filament architecture and orientation were not  
1218 predictable based on cell width but were highly correlated with cell length. Supplemental  
1219 Figure 2 shows results for skewness, angle, and parallelness vs. cell width, which also  
1220 showed no relationship, and Supplemental Figure 1 shows comparisons of Region 2  
1221 and Region 3 mean measurements. Mean cell length, Region 2 =  $57 \pm 28 \mu\text{m}$ . Mean  
1222 cell length, Region 3 =  $128 \pm 34 \mu\text{m}$ . Region 2 measurements are shown in purple  
1223 diamonds; Region 3 in blue circles.

1224 N = 60–120 cells per region from 20 roots. NR, no predictive relationship; \*\*\*,  
1225  $p \leq 0.0001$ , Bivariate fit/ANOVA for all data points for each parameter. Results are from  
1226 one experiment.

1227

1228 **Figure 2.** Timelapse Imaging of Cortical Actin Filaments in Root Epidermal Cells Shows  
1229 Differences in the Dynamic Behavior between Short and Long Cells.



1230 **(A)** and **(C)** The cortical actin cytoskeleton in 6-day-old light-grown root epidermal cells  
1231 expressing GFP-fABD2 was imaged with timelapse VAEM. Representative images of  
1232 individual filament dynamics in short cells (up to 85  $\mu\text{m}$  long, Region 2) and long cells  
1233 (over 94  $\mu\text{m}$  long, Region 3). On average, filaments in short cells **(A; filament**  
1234 **highlighted in purple)** elongated over 25% more slowly and grew to be nearly 30%  
1235 shorter than filaments in long cells **(C; filament highlighted in blue)**. Severing  
1236 frequencies and filament lifetimes did not vary between regions; see Table 1. Scale bar,  
1237 5  $\mu\text{m}$ .

1238 **(B)** and **(D)** Regions of interest (ROI; 227.7  $\mu\text{m}^2$ ) were selected from the same movies  
1239 as **(A)** and **(C)**. Annealing occurs 10 $\times$  more frequently in short cells **(B; filaments**  
1240 **highlighted in purple)** compared with long cells **(D; filament highlighted in blue)**.  
1241 Note that four annealing events (white arrowheads) occurred within 6 s in **(B)** compared  
1242 with only one event in **(D)**. Dots indicate fragments involved in annealing events.  
1243 Quantification of annealing frequencies as well as bundling and unbundling frequencies  
1244 are shown in **Table 1**. Although actin filament arrays in long cells were substantially  
1245 more bundled compared with short cells (see **Figure 1**), there were no differences in  
1246 bundling or unbundling frequencies when event frequencies were calculated on a per-  
1247 minute, per-filament basis. Scale bar, 2  $\mu\text{m}$ .

1248 100-s timelapse movies were collected from short and long cells in the same 30 roots.

1249 Note: Brightness and contrast were enhanced in the montages of Figure 2B and  
1250 Figure 2C to better show the filament and its changes.

1251

1252 **Figure 3. Short-Term IAA treatments Induce Changes in Actin Filament Organization.**

1253 **(A)** Representative VAEM images of GFP-fABD2-labeled actin in epidermal cells from  
1254 Region 2 ( $\leq 85 \mu\text{m}$  long) and Region 3 ( $\geq 94 \mu\text{m}$  long), treated for 20–30 min with  
1255 indicated doses of IAA or mock. Scale bar, 10  $\mu\text{m}$ .

1256 **(B) to (E)** Quantification of actin architecture and orientation in root epidermal cells: IAA  
1257 triggered an increase in actin filament density **(B)** and decrease in skewness **(C)**.  
1258 Region 2 measurements are shown in purple; Region 3 in blue. **(D) and (E)** After IAA  
1259 treatments, actin arrays in both regions were more “organized,” with lower average  
1260 filament angle **(D)** relative to the longitudinal axis of the cell and filaments generally  
1261 more parallel to each other **(E)**. Changes in actin orientation **(D)** and **(E)** were dose-  
1262 dependent, see Supplemental Figure 5.

1263 Cells whose lengths fell between 85 and 94  $\mu\text{m}$  were counted in both regions. N = 8–12  
1264 cells per region per root from at least 10 roots per treatment. ND, no statistical  
1265 differences; \*,  $p \leq 0.05$ ; \*\*,  $p \leq 0.01$ ; \*\*\*,  $p \leq 0.0001$ , oneway ANOVA, compared with  
1266 Dunnett’s Method, comparing doses to mock in each Region, in JMP. Results are from  
1267 one representative experiment of 3 similar experiments with similar results. All IAA  
1268 experiments were performed and analyzed double blind.

1269

1270 **Figure 4.** Short-Term Auxin Treatments Cause Actin Filament Unbundling.

1271 Representative images of individual filament bundling, unbundling, and annealing in  
1272 Region 2 cells **(A)** and **(B)** and Region 3 cells **(C)** and **(D)**; mock **(A)** and **(C)** vs. 10 nM  
1273 IAA **(B)** and **(D)**. Scale bar, 2  $\mu\text{m}$ .

1274 **(A)** and **(B)** Timelapse series of VAEM images show that 10 nM IAA **(B)** increased actin  
1275 filament unbundling in Region 2 within 7 min compared with mock **(A)**. Note that one

1276 unbundling event (filament unbundling shown as blue and green dots separating)  
1277 occurred in **(A)** whereas three occurred in the same timespan in **(B)**. There was also a  
1278 small but statistically significant decrease in annealing events (white arrowheads) after  
1279 IAA treatment. Other aspects of individual filament behaviors did not significantly  
1280 change after treatment; for complete quantification of all measured individual filament  
1281 dynamics, see Table 2.

1282 **(C)** and **(D)** Treatment with 10 nM IAA **(D)** increased actin filament unbundling and  
1283 filament end annealing in Region 3 within 7 min compared with mock **(C)**. Similarly as in  
1284 Region 2, IAA stimulated unbundling of actin filaments: two unbundling events are  
1285 shown in **(D)** compared with only one event in **(C)**. IAA also stimulated an increase in  
1286 annealing in Region 3, where three annealing events are shown by white arrowheads  
1287 **(D)**.

1288 Bundling events are shown by either purple and magenta dots coming together  
1289 (zippering of two independent filaments) or a series of magenta dots increasing in size  
1290 (fluorescence intensity increase with no visible filament zippering).

1291 100-s timelapse movies were collected from short and long cells in the same 28 6-day-  
1292 old, light-grown roots.

1293

1294 **Figure 5.** Actin Organization in *aux1-100* Fails to Respond to Short-Term IAA  
1295 Treatments but Partially Responds to the Membrane-Permeable Auxin NAA.

1296 **(A)** to **(C)** Representative VAEM images of GFP-fABD2-labeled actin in epidermal cells  
1297 from wildtype and *aux1-100*, treated for 20–30 min with mock **(A)**, 10 nM IAA **(B)**, or  
1298 100 nM NAA **(C)**. Scale bar, 5  $\mu$ m.

1299 **(D)** to **(G)** Quantification of actin organization in root epidermal cells. IAA failed to trigger  
1300 an increase in actin filament density in *aux1-100* **(D)** but actin density in *aux1-100*  
1301 increased in response to NAA. Skewness in both genotypes did not significantly  
1302 respond to either treatment **(E)**. Wildtype response is shown in blue and *aux1-100* in  
1303 green; mock, solid; 10 nM IAA, dots; 100 nM NAA, stripes. After IAA and NAA  
1304 treatments, actin arrays in wildtype plants were more “organized,” with lower average  
1305 filament angle **(F)** relative to the longitudinal axis of the cell and filaments generally  
1306 more parallel to each other **(G)**. Average actin filament angle and parallelness in  
1307 *aux1-100* failed to reorganize in response to either IAA (dots) or the membrane-  
1308 permeable auxin NAA (stripes).

1309 N = 7–32 cells per root; 9–11 roots per genotype per treatment. Different letters indicate  
1310 statistically significant differences, oneway ANOVA, compared with Tukey-Kramer HSD  
1311 in JMP. Actin measurements were quantified on a per-cell basis; see Methods for  
1312 description and Supplemental Figure 7 for scatter plots. Results are from one  
1313 representative experiment of 2 similar experiments with similar results. All auxin  
1314 experiments were performed and analyzed double blind.

1315

**Table 1.** Individual Actin Filament Behaviors in Regions 2 and 3

| Parameter                                                                                                                                                                                                                                                                                                                                                                                                                                                                                                                                                                                                                                                                                                                                                                                                                               | Region 2                            | Region 3                                          |
|-----------------------------------------------------------------------------------------------------------------------------------------------------------------------------------------------------------------------------------------------------------------------------------------------------------------------------------------------------------------------------------------------------------------------------------------------------------------------------------------------------------------------------------------------------------------------------------------------------------------------------------------------------------------------------------------------------------------------------------------------------------------------------------------------------------------------------------------|-------------------------------------|---------------------------------------------------|
| <b>Maximum filament length (<math>\mu\text{m}</math>)</b>                                                                                                                                                                                                                                                                                                                                                                                                                                                                                                                                                                                                                                                                                                                                                                               | <b>5.7 <math>\pm</math> 0.3</b>     | <b>8.1 <math>\pm</math> 0.4<sup>***</sup></b>     |
| Filament lifetime (s)                                                                                                                                                                                                                                                                                                                                                                                                                                                                                                                                                                                                                                                                                                                                                                                                                   | 23.5 $\pm$ 1.5                      | 23.5 $\pm$ 1.2 <sup>ND</sup>                      |
| <b>Elongation rate (<math>\mu\text{m/s}</math>)</b>                                                                                                                                                                                                                                                                                                                                                                                                                                                                                                                                                                                                                                                                                                                                                                                     | <b>0.96 <math>\pm</math> 0.05</b>   | <b>1.32 <math>\pm</math> 0.08<sup>***</sup></b>   |
| Severing frequency (breaks/ $\mu\text{m/s}$ )                                                                                                                                                                                                                                                                                                                                                                                                                                                                                                                                                                                                                                                                                                                                                                                           | 0.04 $\pm$ 0.004                    | 0.04 $\pm$ 0.003 <sup>ND</sup>                    |
| <b>Event frequency/minute per filament</b>                                                                                                                                                                                                                                                                                                                                                                                                                                                                                                                                                                                                                                                                                                                                                                                              |                                     |                                                   |
| Bundling <sup>a</sup>                                                                                                                                                                                                                                                                                                                                                                                                                                                                                                                                                                                                                                                                                                                                                                                                                   | 0.111 $\pm$ 0.009                   | 0.103 $\pm$ 0.009 <sup>ND</sup>                   |
| Unbundling                                                                                                                                                                                                                                                                                                                                                                                                                                                                                                                                                                                                                                                                                                                                                                                                                              | 0.030 $\pm$ 0.004                   | 0.032 $\pm$ 0.004 <sup>ND</sup>                   |
| <b>Annealing</b>                                                                                                                                                                                                                                                                                                                                                                                                                                                                                                                                                                                                                                                                                                                                                                                                                        | <b>0.100 <math>\pm</math> 0.009</b> | <b>0.012 <math>\pm</math> 0.003<sup>***</sup></b> |
| <p>Values are means <math>\pm</math> standard error.</p> <p><sup>a</sup>Bundling includes both zippering (<math>\approx</math> 90% of observed bundling events) and “other” (remaining <math>\approx</math> 10% of observed bundling events); see Methods for more information.</p> <p>Average number of actin filaments and bundles per 227.7 <math>\mu\text{m}^2</math> ROI: Region 2, 98.7 <math>\pm</math> 4.1; Region 3, 64.6 <math>\pm</math> 2.4.</p> <p>Per region, N = at least 50 filaments from more than 25 cells from <math>\geq</math> 15 roots. Bundling, unbundling, and annealing events: per root region, N = regions of interest (ROI; 227.7 <math>\mu\text{m}^2</math>) from a total of 30–37 cells from 30 roots. ND, no statistical differences; <sup>***</sup>, <math>p \leq 0.001</math>, Student’s t-test.</p> |                                     |                                                   |

**Table 2.** Actin Filament Dynamics after Treatment with IAA

| Parameter/Treatment                                                                                                                                                                                                                                                                                                                                                                                                                                                                 | Region 2                            |                                           | Region 3                            |                                           |
|-------------------------------------------------------------------------------------------------------------------------------------------------------------------------------------------------------------------------------------------------------------------------------------------------------------------------------------------------------------------------------------------------------------------------------------------------------------------------------------|-------------------------------------|-------------------------------------------|-------------------------------------|-------------------------------------------|
|                                                                                                                                                                                                                                                                                                                                                                                                                                                                                     | MOCK                                | IAA                                       | MOCK                                | IAA                                       |
| Maximum filament length ( $\mu\text{m}$ )                                                                                                                                                                                                                                                                                                                                                                                                                                           | $5.2 \pm 0.2$                       | $4.6 \pm 0.2^{\text{ND}}$                 | $9.8 \pm 0.6$                       | $9.7 \pm 0.4^{\text{ND}}$                 |
| Filament lifetime (s)                                                                                                                                                                                                                                                                                                                                                                                                                                                               | $27.4 \pm 1.9$                      | $24.9 \pm 1.2^{\text{ND}}$                | $28.8 \pm 2.2$                      | $33.9 \pm 2.1^{\text{ND}}$                |
| Elongation rate ( $\mu\text{m/s}$ )                                                                                                                                                                                                                                                                                                                                                                                                                                                 | $0.97 \pm 0.14$                     | $0.88 \pm 0.05^{\text{ND}}$               | $1.63 \pm 0.06$                     | $1.62 \pm 0.07^{\text{ND}}$               |
| Severing frequency (breaks/ $\mu\text{m/s}$ )                                                                                                                                                                                                                                                                                                                                                                                                                                       | $0.05 \pm 0.003$                    | $0.06 \pm 0.003^{\text{ND}}$              | $0.03 \pm 0.002$                    | $0.03 \pm 0.002^{\text{ND}}$              |
| <b>Event frequency/minute per filament</b>                                                                                                                                                                                                                                                                                                                                                                                                                                          |                                     |                                           |                                     |                                           |
| Bundling <sup>a</sup>                                                                                                                                                                                                                                                                                                                                                                                                                                                               | $0.216 \pm 0.023$                   | $0.170 \pm 0.015^{\text{ND}}$             | $0.239 \pm 0.023$                   | $0.187 \pm 0.015^{\text{ND}}$             |
| <b>Unbundling</b>                                                                                                                                                                                                                                                                                                                                                                                                                                                                   | <b><math>0.092 \pm 0.010</math></b> | <b><math>0.218 \pm 0.017^{***}</math></b> | <b><math>0.104 \pm 0.012</math></b> | <b><math>0.208 \pm 0.025^{**}</math></b>  |
| <b>Annealing</b>                                                                                                                                                                                                                                                                                                                                                                                                                                                                    | <b><math>0.172 \pm 0.009</math></b> | <b><math>0.133 \pm 0.013^*</math></b>     | <b><math>0.034 \pm 0.006</math></b> | <b><math>0.147 \pm 0.020^{***}</math></b> |
| Values are means $\pm$ standard error.                                                                                                                                                                                                                                                                                                                                                                                                                                              |                                     |                                           |                                     |                                           |
| <sup>a</sup> Bundling includes both zippering ( $\approx 90\%$ of observed bundling events) and “other” (remaining $\approx 10\%$ of observed bundling events); see Methods for more information. These percentages hold for both mock- and IAA-treated plants.                                                                                                                                                                                                                     |                                     |                                           |                                     |                                           |
| Average number of actin filaments and bundles per $57.8 \mu\text{m}^2$ ROI: Region 2, $48.6 \pm 2.1$ ; Region 2 + IAA, $48.4 \pm 1.6$ ; Region 3, $26.9 \pm 1.1$ ; Region 3 + IAA, $28 \pm 1.3$ ; see Methods.                                                                                                                                                                                                                                                                      |                                     |                                           |                                     |                                           |
| 6-day-old roots were treated with 10 nM IAA or mock and epidermal cells were imaged for up to 7 min after treatment.                                                                                                                                                                                                                                                                                                                                                                |                                     |                                           |                                     |                                           |
| Per region per treatment, N = at least 50 filaments from $\geq 20$ cells from $\geq 12$ roots. ND = no statistical differences, Student’s t-test compared with mock for that region. Bundling, unbundling, and annealing events: per root region per treatment, N = regions of interest (ROI; $57.8 \mu\text{m}^2$ ) from a total of 21–23 cells from 18–22 roots. *, $p \leq 0.05$ ; **, $p \leq 0.001$ ; ***, $p \leq 0.0001$ ; ND, no statistical differences, Student’s t-test. |                                     |                                           |                                     |                                           |

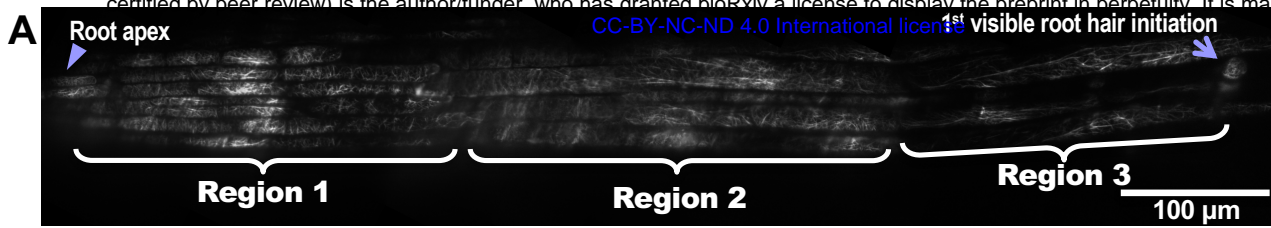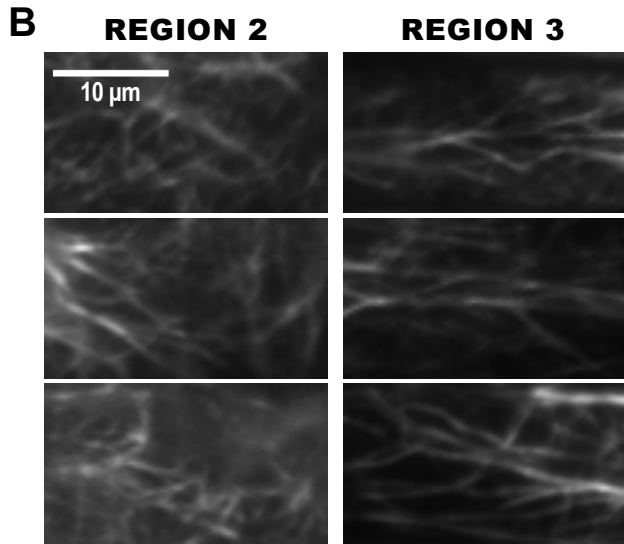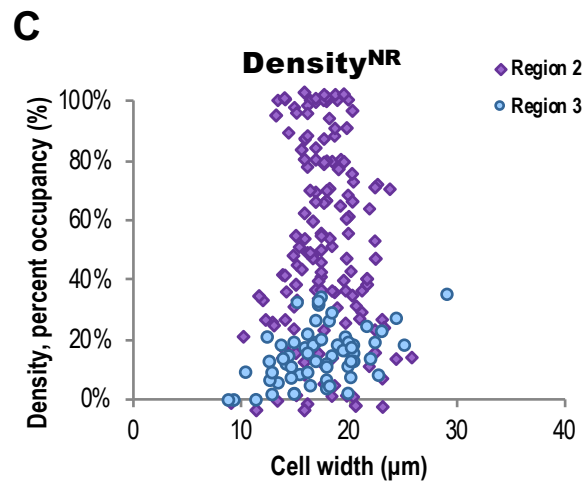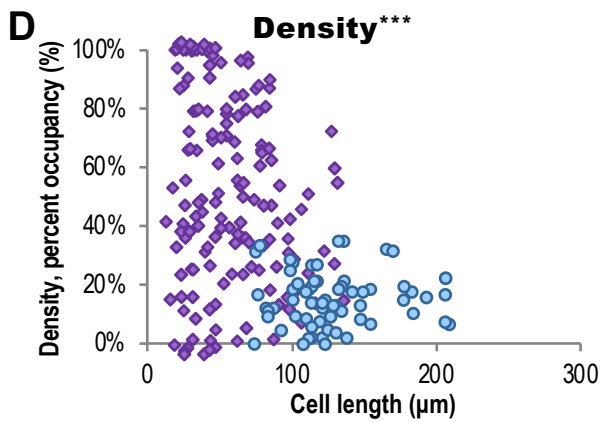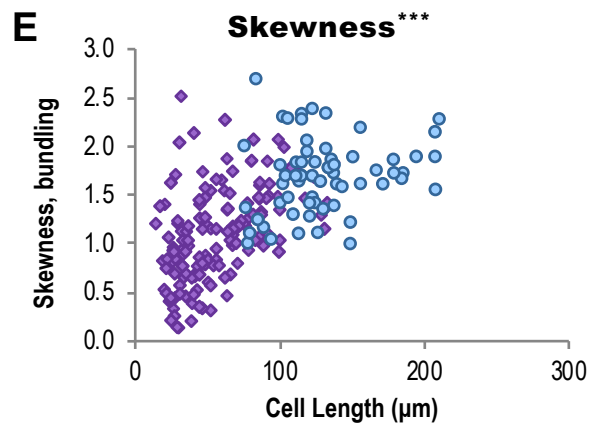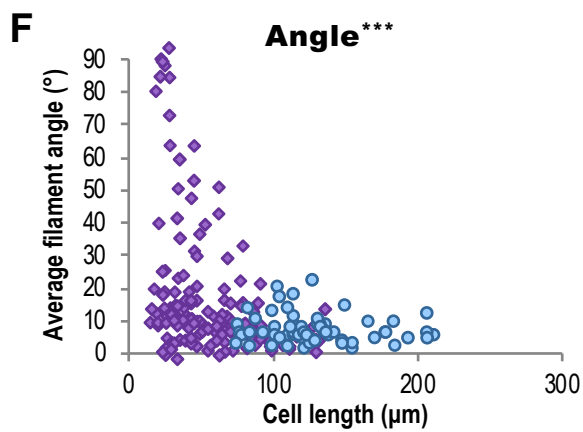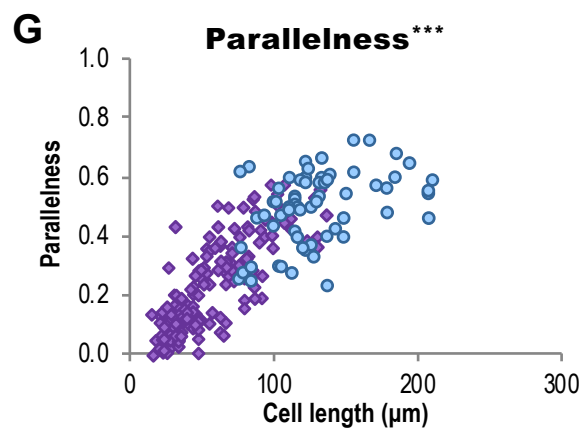

**Figure 1. Actin Architecture is Predictive of Epidermal Cell Length in the Root Elongation Zone.**

**(A)** Mosaic of root elongation zone in an Arabidopsis seedling expressing GFP-fABD2 imaged with variable angle epifluorescence microscopy (VAEM). Arrowhead, root apex; arrow, first root hair initiation. MosaicJ was used to compile 13 original VAEM images. Scale bar, 100  $\mu\text{m}$ .

**(B)** Representative images of actin organization in two root regions. Scale bar, 10  $\mu\text{m}$ .

**(C) to (G)** Quantification of actin architecture or orientation metrics plotted with respect to corresponding epidermal cell length **(D)**, **(E)**, **(F)**, and **(G)** or cell width **(C)** in two regions within the root elongation zone. Filament architecture and orientation were not predictable based on cell width but were highly correlated with cell length. Supplemental Figure 2 shows results for skewness, angle, and parallelness vs. cell width, which also showed no relationship, and Supplemental Figure 1 shows comparisons of Region 2 and Region 3 mean measurements. Mean cell length, Region 2 =  $57 \pm 28 \mu\text{m}$ . Mean cell length, Region 3 =  $128 \pm 34 \mu\text{m}$ . Region 2 measurements are shown in purple diamonds; Region 3 in blue circles.

N = 60–120 cells per region from 20 roots. NR, no predictive relationship; \*\*\*,  $p \leq 0.0001$ , Bivariate fit/ANOVA for all data points for each parameter. Results are from one experiment.



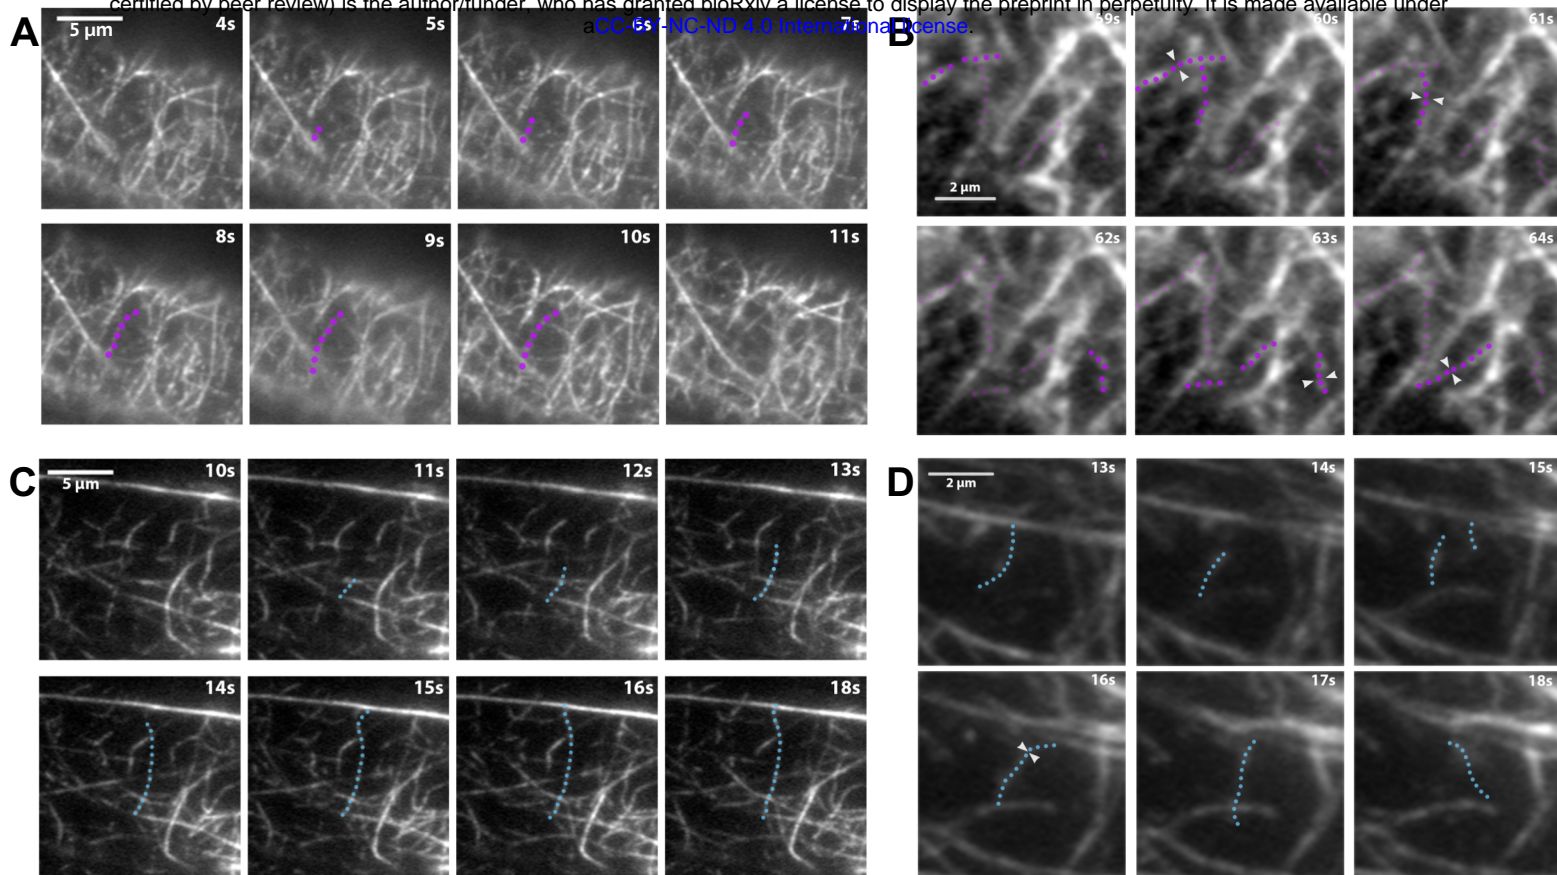

**Figure 2.** Timelapse Imaging of Cortical Actin Filaments in Root Epidermal Cells Shows Differences in the Dynamic Behavior between Short and Long Cells.

**(A)** and **(C)** The cortical actin cytoskeleton in 6-day-old light-grown root epidermal cells expressing GFP-fABD2 was imaged with timelapse VAEM. Representative images of individual filament dynamics in short cells (up to 85  $\mu\text{m}$  long, Region 2) and long cells (over 94  $\mu\text{m}$  long, Region 3). On average, filaments in short cells **(A; filament highlighted in purple)** elongated over 25% more slowly and grew to be nearly 30% shorter than filaments in long cells **(C; filament highlighted in blue)**. Severing frequencies and filament lifetimes did not vary between regions; see Table 1. Scale bar, 5  $\mu\text{m}$ .

**(B)** and **(D)** Regions of interest (ROI; 227.7  $\mu\text{m}^2$ ) were selected from the same movies as **(A)** and **(C)**. Annealing occurs 10 $\times$  more frequently in short cells **(B; filaments highlighted in purple)** compared with long cells **(D; filament highlighted in blue)**. Note that four annealing events (white arrowheads) occurred within 6 s in **(B)** compared with only one event in **(D)**. Dots indicate fragments involved in annealing events. Quantification of annealing frequencies as well as bundling and unbundling frequencies are shown in **Table 1**. Although actin filament arrays in long cells were substantially more bundled compared with short cells (see **Figure 1**), there were no differences in bundling or unbundling frequencies when event frequencies were calculated on a per-minute, per-filament basis. Scale bar, 2  $\mu\text{m}$ .

100-s timelapse movies were collected from short and long cells in the same 30 roots.

Note: Brightness and contrast were enhanced in the montages of Figure 2B and Figure 2C to better show the filament and its changes.

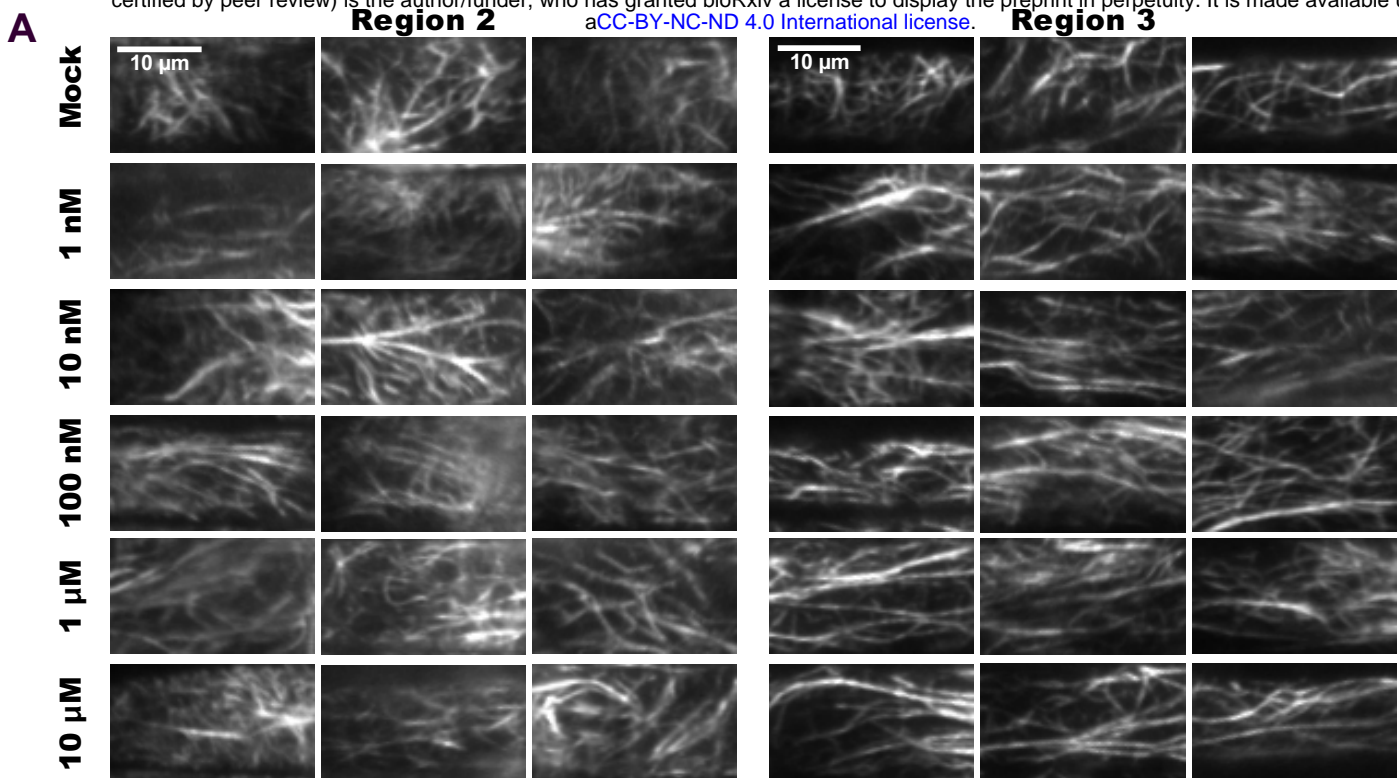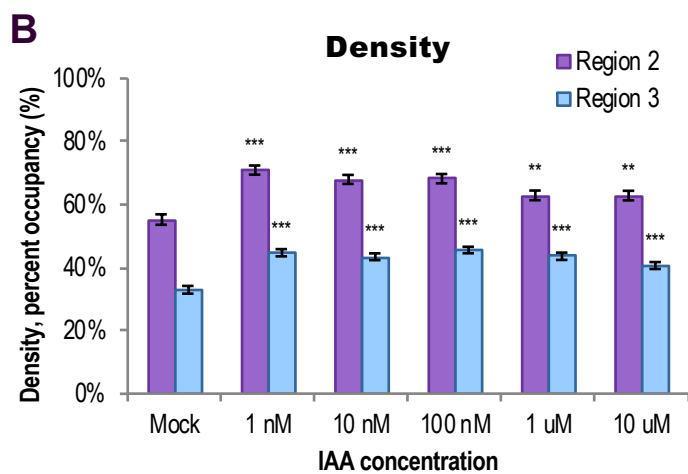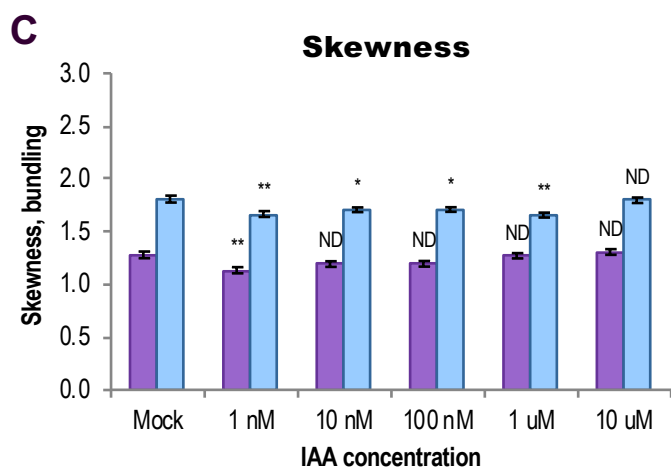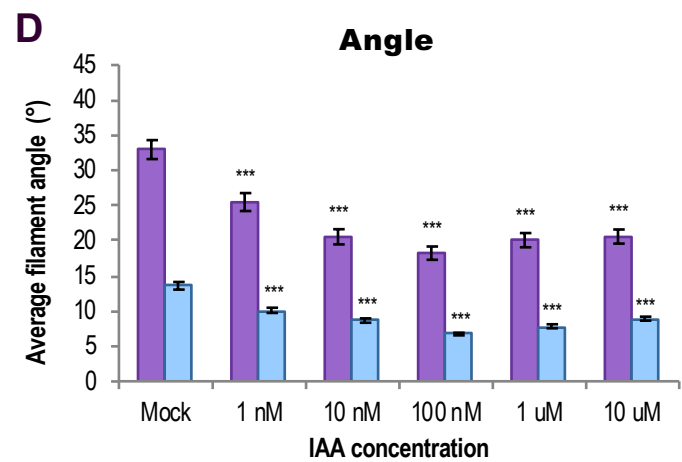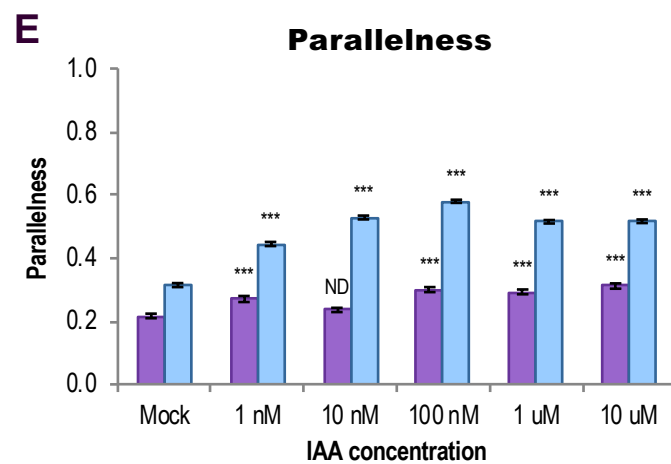

**Figure 3. Short-Term IAA treatments Induce Changes in Actin Filament Organization.**

**(A)** Representative VAEM images of GFP-fABD2-labeled actin in epidermal cells from Region 2 ( $\leq 85 \mu\text{m}$  long) and Region 3 ( $\geq 94 \mu\text{m}$  long), treated for 20–30 min with indicated doses of IAA or mock. Scale bar, 10  $\mu\text{m}$ .

**(B) to (E)** Quantification of actin architecture and orientation in root epidermal cells: IAA triggered an increase in actin filament density **(B)** and decrease in skewness **(C)**. Region 2 measurements are shown in purple; Region 3 in blue. **(D) and (E)** After IAA treatments, actin arrays in both regions were more “organized,” with lower average filament angle **(D)** relative to the longitudinal axis of the cell and filaments generally more parallel to each other **(E)**. Changes in actin orientation **(D)** and **(E)** were dose-dependent, see Supplemental Figure 5.

Cells whose lengths fell between 85 and 94  $\mu\text{m}$  were counted in both regions. N = 8–12 cells per region per root from at least 10 roots per treatment. ND, no statistical differences; \*,  $p \leq 0.05$ ; \*\*,  $p \leq 0.01$ ; \*\*\*,  $p \leq 0.0001$ , oneway ANOVA, compared with Dunnett’s Method, comparing doses to mock in each Region, in JMP. Results are from one representative experiment of 3 similar experiments with similar results. All IAA experiments were performed and analyzed double blind.

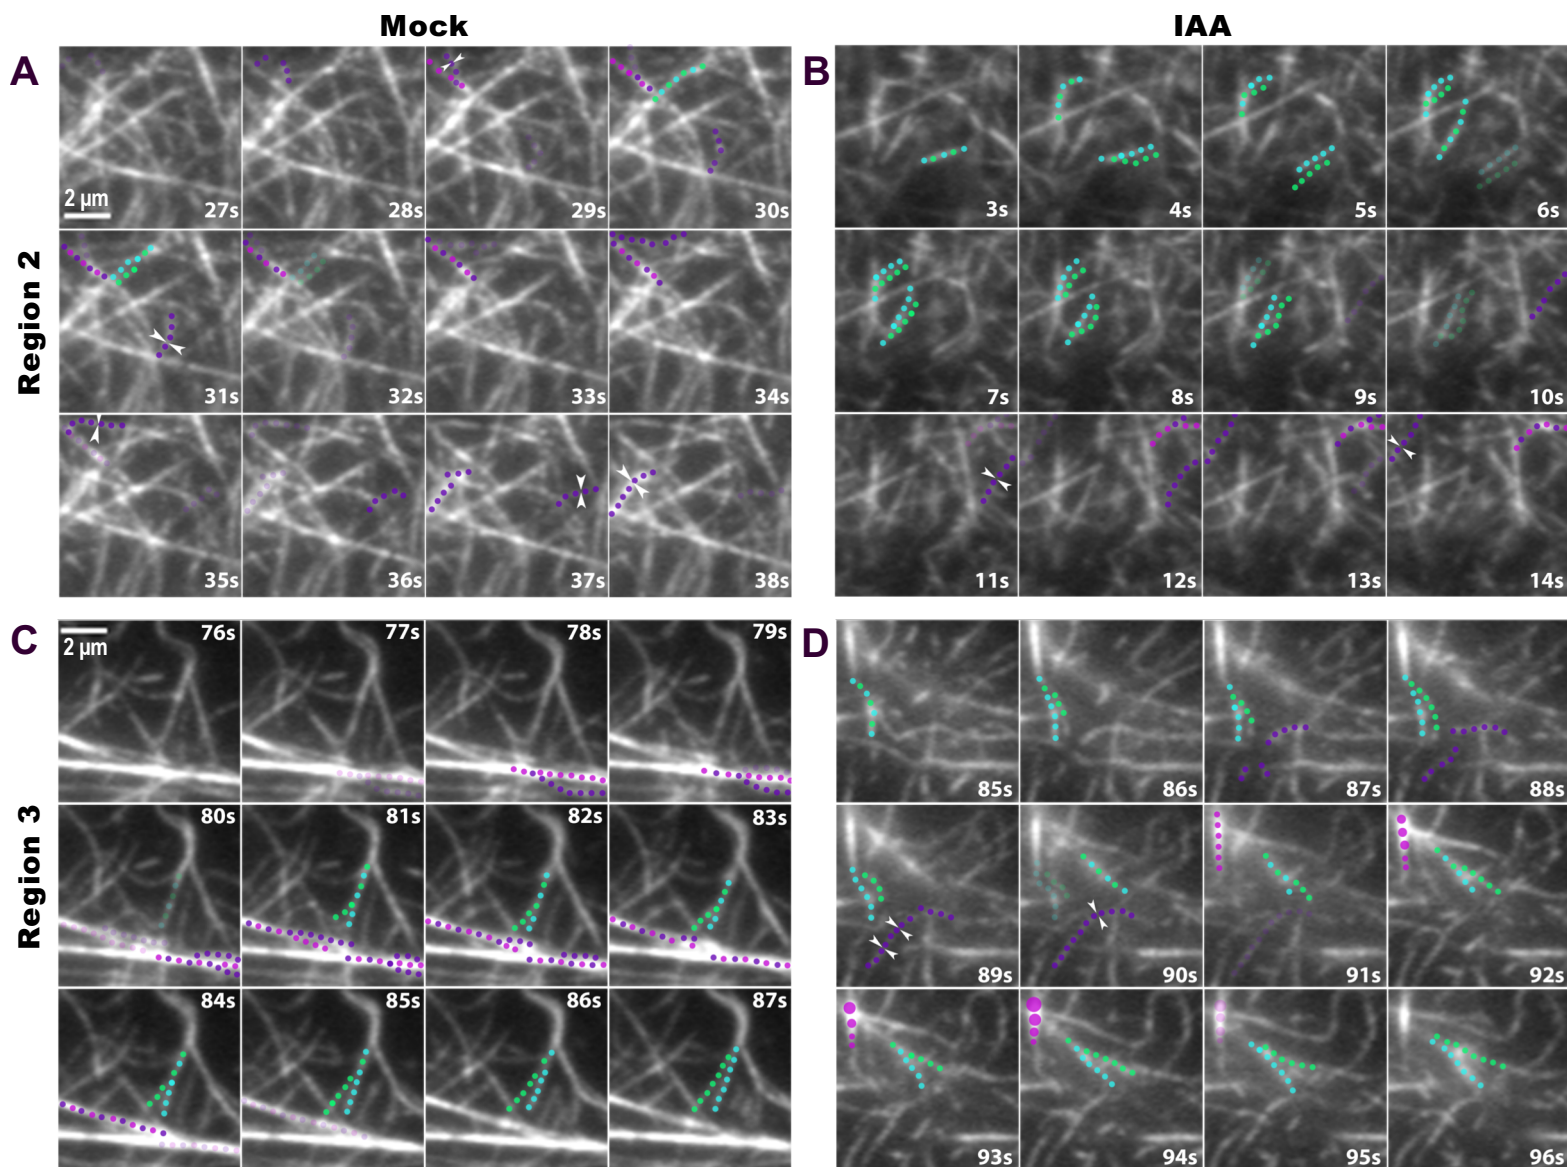

**Figure 4.** Short-Term Auxin Treatments Cause Actin Filament Unbundling.

Representative images of individual filament bundling, unbundling, and annealing in Region 2 cells **(A)** and **(B)** and Region 3 cells **(C)** and **(D)**; mock **(A)** and **(C)** vs. 10 nM IAA **(B)** and **(D)**. Scale bar, 2 μm.

**(A)** and **(B)** Timelapse series of VAEM images show that 10 nM IAA **(B)** increased actin filament unbundling in Region 2 within 7 min compared with mock **(A)**. Note that one unbundling event (filament unbundling shown as blue and green dots separating) occurred in **(A)** whereas three occurred in the same timespan in **(B)**. There was also a small but statistically significant decrease in annealing events (white arrowheads) after IAA treatment. Other aspects of individual filament behaviors did not significantly change after treatment; for complete quantification of all measured individual filament dynamics, see Table 2.

**(C)** and **(D)** Treatment with 10 nM IAA **(D)** increased actin filament unbundling and filament end annealing in Region 3 within 7 min compared with mock **(C)**. Similarly as in Region 2, IAA stimulated unbundling of actin filaments: two unbundling events are shown in **(D)** compared with only one event in **(C)**. IAA also stimulated an increase in annealing in Region 3, where three annealing events are shown by white arrowheads **(D)**.

Bundling events are shown by either purple and magenta dots coming together (zippering of two independent filaments) or a series of magenta dots increasing in size (fluorescence intensity increase with no visible filament zippering).

100-s timelapse movies were collected from short and long cells in the same 28 6-day-old, light-grown roots.

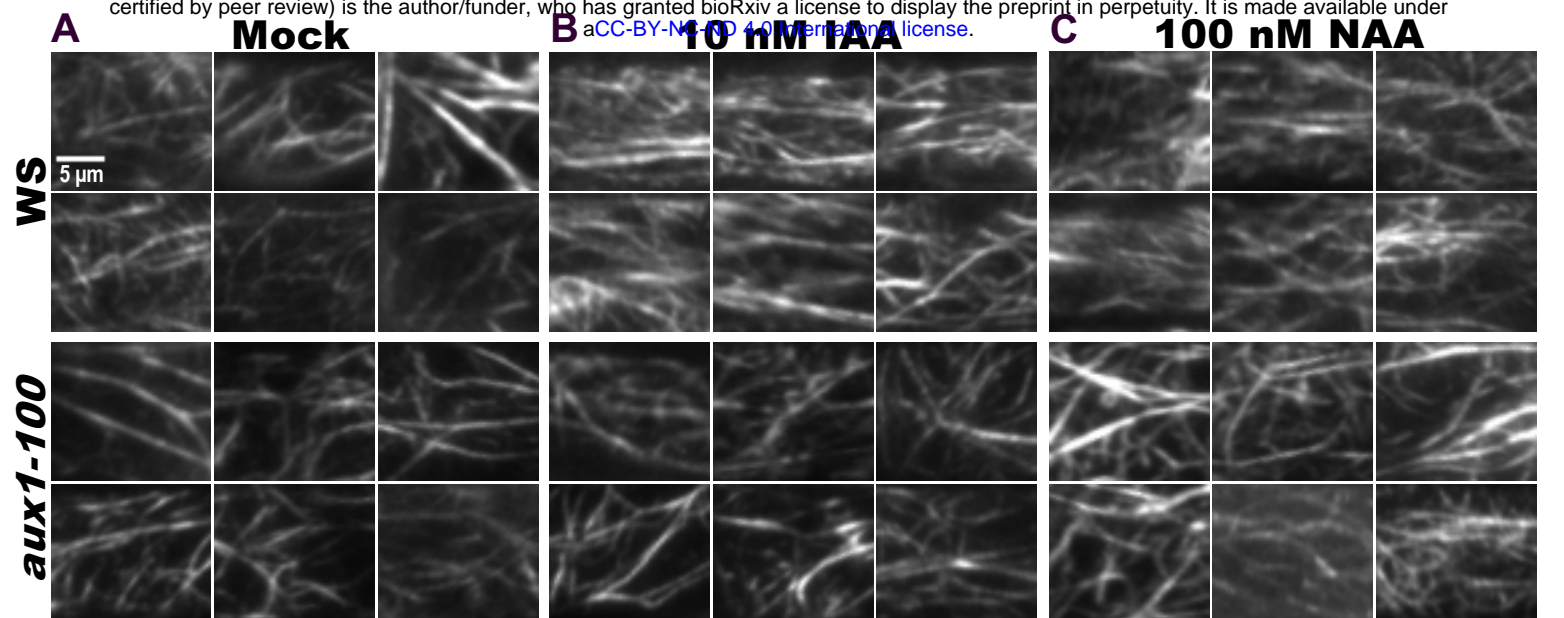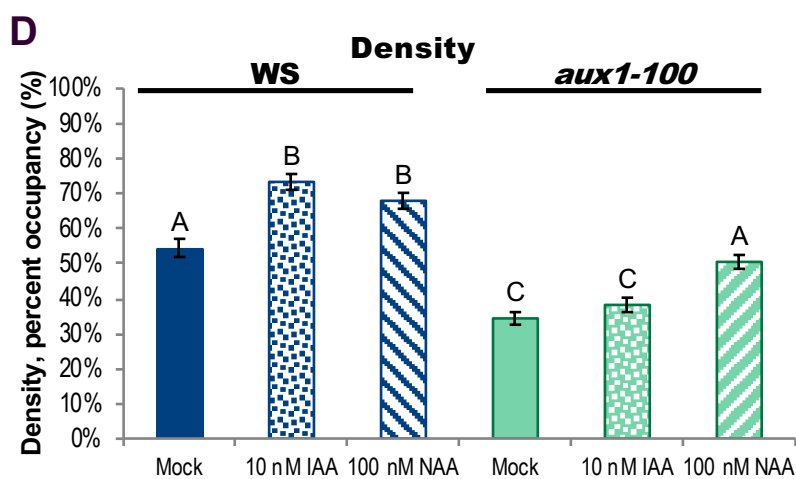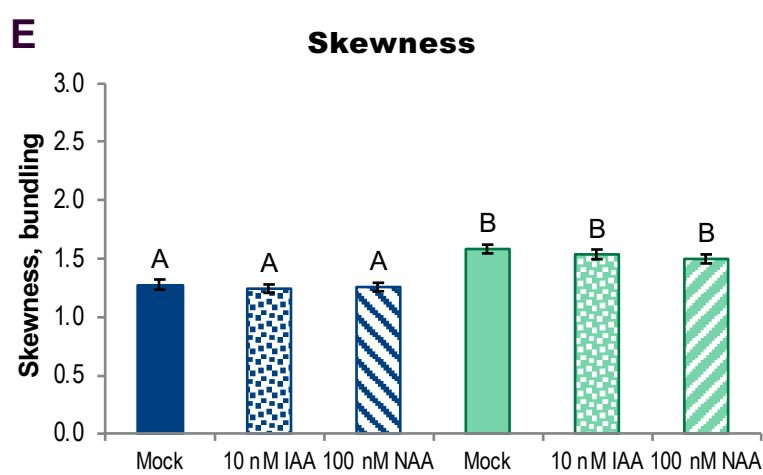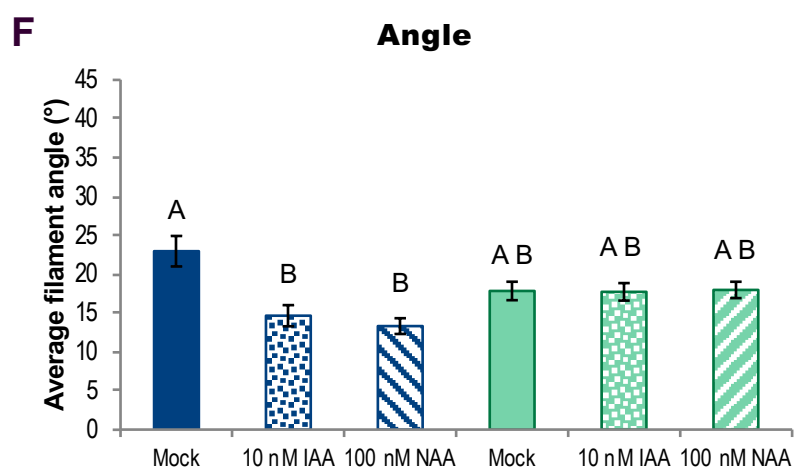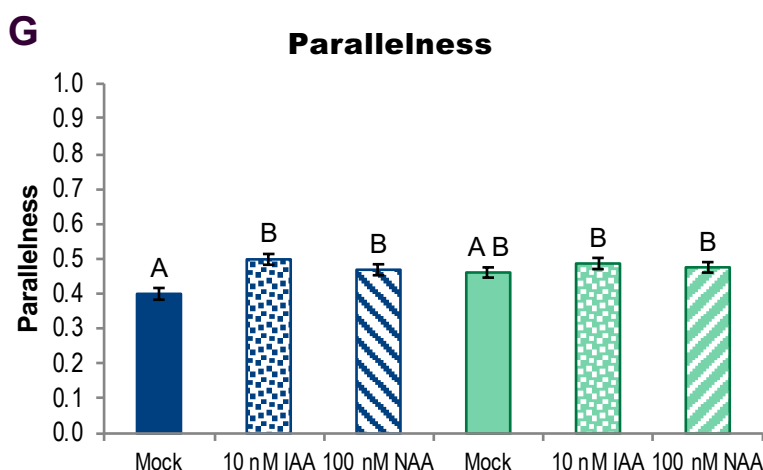

**Figure 5.** Actin Organization in *aux1-100* Fails to Respond to Short-Term IAA Treatments but Partially Responds to the Membrane-Permeable Auxin NAA.

**(A) to (C)** Representative VAEM images of GFP-fABD2-labeled actin in epidermal cells from wildtype and *aux1-100*, treated for 20–30 min with mock **(A)**, 10 nM IAA **(B)**, or 100 nM NAA **(C)**. Scale bar, 5  $\mu$ m.

**(D) to (G)** Quantification of actin organization in root epidermal cells. IAA failed to trigger an increase in actin filament density in *aux1-100* **(D)** but actin density in *aux1-100* increased in response to NAA. Skewness in both genotypes did not significantly respond to either treatment **(E)**. Wildtype response is shown in blue and *aux1-100* in green; mock, solid; 10 nM IAA, dots; 100 nM NAA, stripes. After IAA and NAA treatments, actin arrays in wildtype plants were more “organized,” with lower average filament angle **(F)** relative to the longitudinal axis of the cell and filaments generally more parallel to each other **(G)**. Average actin filament angle and parallelness in *aux1-100* failed to reorganize in response to either IAA (dots) or the membrane-permeable auxin NAA (stripes).

N = 7–32 cells per root; 9–11 roots per genotype per treatment. Different letters indicate statistically significant differences, oneway ANOVA, compared with Tukey-Kramer HSD in JMP. Actin measurements were quantified on a per-cell basis; see Methods for description and Supplemental Figure 7 for scatter plots. Results are from one representative experiment of 2 similar experiments with similar results. All auxin experiments were performed and analyzed double blind.
